## 1 **Revisiting *Cryptococcus* extracellular vesicles properties and their use as** 2 **vaccine platforms**

3  
4 Juliana RIZZO<sup>1#</sup>, Sarah Sze Wah WONG<sup>2</sup>, Anastasia D. GAZI<sup>3</sup>, Frédérique MOYRAND<sup>1#</sup>,  
5 Thibault CHAZE<sup>4</sup>, Pierre-Henri COMMERE<sup>5</sup>, Sophie NOVAULT<sup>5</sup>, Mariette MATONDO<sup>4</sup>,  
6 Gerard PEHAU-ARNAUDET<sup>3</sup>, Flavia C. G. REIS<sup>6,7#</sup>, Matthijn VOS<sup>8</sup>, Lysangela R  
7 ALVES<sup>6#</sup>, Robin C. MAY<sup>9#</sup>, Leonardo NIMRICHTER<sup>10#</sup>, Marcio L. RODRIGUES<sup>6,10#</sup>,  
8 Vishukumar AIMANIANDA<sup>2</sup> and Guilhem JANBON<sup>1#\*</sup>

9  
10 <sup>1</sup> Unité Biologie des ARN des Pathogènes Fongiques, Département de Mycologie, Institut Pasteur, F-  
11 75015, Paris, France

12 <sup>2</sup> Unité Mycologie Moléculaire, CNRS UMR2000, Département de Mycologie, Institut Pasteur, F-  
13 75015, Paris, France

14 <sup>3</sup> Ultrastructural Bio-Imaging, UTechS UBI, Département de Biologie cellulaire et infection, UMR  
15 3528 CNRS, Institut Pasteur, F-75015, Paris, France

16 <sup>4</sup> Plateforme Protéomique, Unité de Spectrométrie de Masse pour la Biologie (MSBio), Centre de  
17 Ressources et Recherches Technologiques (C2RT), UMR 2000 CNRS, Institut Pasteur, Paris, France

18 <sup>5</sup> Cytometry and Biomarkers, Centre de Ressources et Recherches Technologiques (C2RT), Institut  
19 Pasteur, F-75015, Paris, France

20 <sup>6</sup> Instituto Carlos Chagas, Fundação Oswaldo Cruz (FIOCRUZ), Curitiba, Brazil

21 <sup>7</sup> Centro de Desenvolvimento Tecnológico em Saúde (CDTS-Fiocruz), Brazil

22 <sup>8</sup> NanoImaging Core Facility, Centre de Ressources et Recherches Technologiques (C2RT), Institut  
23 Pasteur, F-75015, Paris, France

24 <sup>9</sup> Institute of Microbiology and Infection and School of Biosciences, University of Birmingham,  
25 Birmingham B15 2TT, United Kingdom

26 <sup>10</sup> Instituto de Microbiologia Paulo de Góes (IMPG), Universidade Federal do Rio de Janeiro, Rio de  
27 Janeiro, Brazil

28  
29 <sup>#</sup> Members of the data sharing transparency group on fungal extracellular vesicles

30 <sup>\*</sup> Corresponding author: janbon@pasteur.fr

31

32

33 **Abstract**

34

35 Whereas extracellular vesicle (EV) research has become commonplace in different  
36 biomedical fields, this field of research is still in its infancy in mycology. Here we provide a  
37 robust set of data regarding the structural and compositional aspects of EVs isolated from the  
38 fungal pathogenic species *Cryptococcus neoformans*, *C. deneoformans* and *C. deuterogattii*.  
39 Using cutting-edge methodological approaches including cryogenic electron microscopy and  
40 cryogenic electron tomography, proteomics, and flow cytometry, we revisited cryptococcal  
41 EV features and suggest a new EV structural model, in which the vesicular lipid bilayer is  
42 covered by mannoprotein-based fibrillar decoration, bearing the capsule polysaccharide as its  
43 outer layer. About 10% of the EV population is devoid of fibrillar decoration, adding another  
44 aspect to EV diversity. By analyzing EV protein cargo from the three species, we  
45 characterized the typical *Cryptococcus* EV proteome. It contains several membrane-bound  
46 protein families, including some Tsh proteins bearing a SUR7/PaII motif. The presence of  
47 known protective antigens on the surface of *Cryptococcus* EVs, resembling the morphology  
48 of encapsulated virus structures, suggested their potential as a vaccine. Indeed, mice  
49 immunized with EVs obtained from an acapsular *C. neoformans* mutant strain rendered a  
50 strong antibody response in mice and significantly prolonged their survival upon *C.*  
51 *neoformans* infection.

52

53 **Keywords:** *Cryptococcus*, fungal infections, extracellular vesicles, mannoproteins, vaccine,  
54 Cryo-EM

55

56

57

58

## 59        **1. Introduction**

60            All living organisms release lipid bilayer-delimited particles defined as extracellular  
61 vesicles (EVs) (Deatherage and Cookson 2012, Witwer and Théry 2019). EV size ranges from  
62 20 nm to close to one micrometer in diameter. In mammalian cells, two major classes of EVs  
63 have been defined, microvesicles and exosomes, according to their size and cellular origin  
64 (Meldolesi 2018, van Niel et al. 2018). In these organisms, a large body of literature describes  
65 how EVs participate in intercellular signaling within and in organism-to-organism  
66 communication, including carcinogenesis and host-pathogen interactions (Xu et al. 2018,  
67 Shopova et al. 2020). In fungi, the first report of fungal EVs was published in 2007  
68 (Rodrigues et al. 2007), and, since then, their existence has been reported in many species of  
69 pathogenic and nonpathogenic fungi (Rizzo et al. 2020).

70            By analogy with mammalian EVs, it has been hypothesized that fungal EVs could also  
71 participate in many biological processes (Rodrigues and Casadevall 2018). Indeed, some  
72 reports indicate their relevance in diverse mechanisms related to fungal pathophysiology, such  
73 as antifungal resistance and biofilm formation (Leone et al. 2018, Zarnowski et al. 2018),  
74 transfer of virulence-associated molecules and modulation of host cells (Oliveira et al. 2010,  
75 Vargas et al. 2015, Rizzo et al. 2017, Bielska et al. 2018, Souza et al. 2019, Hai et al. 2020),  
76 cell wall remodeling and biogenesis (Zhao et al. 2019, Rizzo et al. 2020), among others  
77 (Bielska and May 2019, Rizzo et al. 2020). Nevertheless, the molecular mechanisms  
78 implicated in these exchanges of information, as well as the genetics regulating fungal EV  
79 biogenesis and release, remain elusive.

80            As with their mammalian, bacterial and plant counterparts, fungal EVs have been  
81 shown to contain proteins, pigments, nucleic acids, polysaccharides, lipids, among other  
82 molecules (Eisenman et al. 2009, Vallejo et al. 2012, da Silva et al. 2015, Rodrigues et al.  
83 2015, Joffe et al. 2016, Rayner et al. 2017, Reis et al. 2021). Besides the claudin-like Sur7  
84 family proteins, recently suggested as EV protein markers in *Candida albicans* (Dawson et al.  
85 2020), no other fungal EV specific molecular marker has been reported. Indeed, the laborious  
86 and inefficient EV isolation protocols that have been used until recently have strongly limited  
87 the knowledge on their composition. Additional hurdles regarding purification methods  
88 potentially affect an accurate vesicular compositional characterization (Théry et al. 2018),  
89 including potential carryover contaminants such as protein aggregates (Chiou et al. 2018).  
90 Regarding EV morphological diversity, previous studies have reported the heterogeneity of  
91 fungal EV size, as recently reviewed (Bielska and May 2019). However, single particle  
92 analyzers such as the widely used Nanoparticle Tracking Analysis (NTA) and most common

93 flow cytometers cannot reliably evaluate particles smaller than 100 nm in diameter (Maas et  
94 al. 2015, Théry et al. 2018, Chiang and Chen 2019, Noble et al. 2020). Overall, although a  
95 considerable number of fungal EV-related studies have been published in recent years, our  
96 knowledge of fungal EV structure and composition remains limited, which prevents further  
97 robust analysis of their functions.

98         Seven species of pathogenic *Cryptococcus* have been described (Hagen et al. 2015).  
99 Whereas species belonging to the *neoformans* clade (*C. neoformans* and *C. deneoformans*)  
100 typically affect immunocompromised patients, species belonging to the *gattii* clade (*C. gattii*,  
101 *C. deuterogattii*, *C. tetragattii*, *C. decagattii*, and *C. bacillisporus*) are often primary  
102 pathogens and can cause aggressive pulmonary infections as well as meningoencephalitis  
103 (Kwon-Chung et al. 2014, Rajasingham et al. 2017, Janbon et al. 2019). *C. neoformans* has  
104 historically been one of the most studied fungi regarding EV biology (Rodrigues et al. 2007,  
105 Bielska and May 2019, Rizzo et al. 2020). However, the only structural analyses of EVs from  
106 this organism are now very outdated and technologies used have shown tremendous  
107 improvements since then (Emelyanov et al. 2020, Noble et al. 2020).

108         To date, *Cryptococcus* EV proteomic approaches have identified 92 and 202 proteins,  
109 with very poor overlap and no evaluation of their abundance or enrichment (Rodrigues et al.  
110 2008, Wolf et al. 2014). Finally, although the current model of fungal EV structure contains  
111 proteins located on the vesicular surface (by analogy with the mammalian EV structures  
112 (Emelyanov et al. 2020, Noble et al. 2020)), more experimental evidence is necessary to  
113 identify these putative membrane-associated molecules. Since many immunogenic proteins  
114 are often found to be associated with EVs, their vaccine potential has been explored mostly  
115 for bacterial and parasitic infections (Coakley et al. 2017, Wang et al. 2018), and more  
116 recently also for fungal infections (Colombo et al. 2019, Vargas et al. 2020).

117         In the present study, we used the recently described protocol (Reis et al. 2019) to  
118 obtain EV-enriched samples from *Cryptococcus*, together with cutting edge methodological  
119 approaches to revisit *Cryptococcus* EV structure, cargo, and their biological functions. Here  
120 we report a detailed analysis of three species (*C. neoformans*, *C. neoformans* and *C.*  
121 *deuterogattii*) for which both a good genome annotation and RNA-Seq data were available  
122 (Janbon et al. 2014, Gonzalez-Hilarion et al. 2016, Gröhs Ferrareze et al. 2021). We produced  
123 a robust set of data containing cryo-electron microscopy (cryo-EM) and cryo-electron  
124 tomography (cryo-ET) proteomics, and nanoscale flow cytometry analysis, suggesting a new  
125 EV structural model, in addition to a list of cryptococcal EV protein markers. Our results led

126 us to further evaluate the EV biological roles in murine models, emphasizing their potential  
127 use as an anti-cryptococcosis vaccine.

128

## 129 **2. Material and Methods**

130

### 131 **Strains and media**

132 The wild type strains used in the study were *C. neoformans* strain KN99 $\alpha$ , *C. deneoformans*  
133 strain JEC21, *C. deuterogattii* strain R265, *C. albicans* strain SC5314, and *S. cerevisiae* strain  
134 S288C. The *C. neoformans* strain NE367 (*MAT $\alpha$  cap59 $\Delta$ ::NAT*) has been previously  
135 described (Moyrand et al. 2007). The strains *MAT $\alpha$  vep1 $\Delta$ ::NAT* (CNAG\_03223), *MAT $\alpha$*   
136 *hoc3 $\Delta$ ::NAT* (CNAG\_00158), *MAT $\alpha$  alg3 $\Delta$ ::NAT* (CNAG\_05142), *MAT $\alpha$  ktr3 $\Delta$ ::NAT*  
137 (CNAG\_03832) have been constructed in the Hiten Madhani lab (UCSF, USA) and obtained  
138 from the Fungal Genetic Stock Center. To construct the strains NE1281 (*MAT $\alpha$*   
139 *mp88 $\Delta$ ::NEO*) and NE1469 (*MAT $\alpha$  vep1 $\Delta$ ::NAT mp88 $\Delta$ ::NEO*), we replaced the entire  
140 CNAG\_00776 (*MP88*) CDS by the NEO marker in the strains KN99 $\alpha$  and *MAT $\alpha$*   
141 *vep1 $\Delta$ ::NAT*, respectively. We here followed the previously described CRISPR CAS9 method  
142 (Fan and Lin 2018). The plasmid pZP-NEO1 used to amplify the *NEO* selective marker was  
143 kindly provided by Dr. Joseph Heitman (Duke University). The deletion cassettes was  
144 constructed using a strategy previously applied to *Neurospora crassa* (Collopy et al. 2010).  
145 The transformants were then screened for homologous integration, as previously described  
146 (Moyrand et al. 2007). Two representatives independently obtained mutant strains were  
147 stocked at -80°C. All primer sequences used are provided in Table S1. All strains were taken  
148 from the G. Janbon laboratory collection at -80°C, plated on yeast extract-peptone-dextrose  
149 (YPD) and incubated at 30°C for 48h before each experiment.

150

### 151 **EV isolation, labelling and proteinase K treatment**

152 EV purification was based on the recently published protocol (Reis et al. 2019) with  
153 some modifications. One loop of cells was inoculated into 10 mL of liquid YPD and  
154 incubated at 30°C for 24h with shaking (150 rpm). Cells were washed twice with 10 ml of  
155 sterile water, counted and diluted to a density of  $3.5 \times 10^7$  cells/mL in water. Aliquots of 300  
156  $\mu$ L of the cellular suspension were spread onto synthetic dextrose (SD) solid medium plates  
157 and incubated for 24 h at 30°C to reach cell confluence. The cells were recovered from each  
158 plate with a 10  $\mu$ L inoculation loop and transferred to an ultracentrifugation tube containing

159 10 mL 0.22  $\mu\text{m}$ -filter sterile of 0.01 M PBS. Cells were homogenized and collected by  
160 centrifugation at 5,000 x g for 15 min at 4°C. Supernatants were collected and centrifuged  
161 again at 15,000 x g for 15 min at 4°C to eliminate cellular debris. The resting supernatants  
162 were filtered through 0.45 $\mu\text{m}$  syringe filters and ultracentrifuged at 100,000 x g for 1h at 4°C  
163 (SW41 Ti swinging-bucket rotor, Beckman Coulter). The supernatant was discarded and the  
164 pellet suspended in 0.22  $\mu\text{m}$ -pore filtered or 0.02  $\mu\text{m}$ -pore filtered (for Flow Cytometry  
165 analysis) PBS for immediately use or stored at -80°C for further experiments. The amount of  
166 total sterol in the EV samples was measured by the Amplex™ Red Cholesterol Assay Kit  
167 (ThermoFisher, A12216) and adjusted for the subsequent experiments.

168 EVs were labelled either with the Concanavalin A (ConA) - Alexa Fluor™ 488  
169 conjugated, or with the Alexa 488 labelled anti-GXM monoclonal antibody 18B7 (Casadevall  
170 et al. 1992), a kind gift of Oscar Zaragoza. The ConA stock solution (5mg/mL) was  
171 previously centrifuged at 13.000 x rpm for 2 min, in order to eliminate possible aggregates,  
172 and diluted to 500  $\mu\text{g}/\text{mL}$  in filtered PBS. In 1.5 mL Eppendorf tubes, 5  $\mu\text{L}$  of ConA (500  
173  $\mu\text{g}/\text{mL}$ ), together with 5  $\mu\text{L}$  EV suspension were add to a final volume of 100  $\mu\text{L}$  filtered  
174 PBS. The tubes were incubated for 1 h at 30°C, under agitation and protected from light.  
175 After incubation, 10 mL of 0.02  $\mu\text{m}$ -pore filtered PBS were added to the EV suspension and  
176 then submitted to ultracentrifugation for 1 h at 100 000 x g at 4°C. The supernatant was again  
177 discarded and pellets suspended in 300  $\mu\text{L}$  of 0.02  $\mu\text{m}$ -pore filtered before being transferred  
178 to BD Trucount™ Tubes (BD Biosciences) and proceeded to Flow Cytometry analysis. A  
179 similar protocol was applied for the EV labelling with the Alexa 488 labelled anti-GXM  
180 monoclonal antibody 18B7, which was diluted 20 times before adding to EV suspension.

181 EV proteinase K treatment was performed following the previously described  
182 protocol (Yang et al. 2021) with some modifications. Briefly, proteinase K was added to the  
183 EV suspension (0.17  $\mu\text{g}$  of sterol) to a final concentration of 2 mg/mL in 0.02  $\mu\text{m}$ -pore  
184 filtered PBS. After proteolysis for 1h at 55°C under agitation (300 rpm), the enzymatic  
185 reaction was stopped by the proteinase inhibitor PMSF (1 mM) for 20 min at RT. Proteinase  
186 K treated EVs were finally submitted to ConA labelling, ultracentrifuge washed as described  
187 before and analyzed by flow cytometry. Control conditions included untreated EVs and EVs  
188 incubated only with PMSF.

189

## 190 **Flow cytometry**

191 EVs were analyzed and sorted on a cell sorter MoFlo Astrios (Beckman Coulter)  
192 equipped with an EQ module specifically developed to detect nanoparticles and with 488 nm

193 and 561 nm lasers at 200 mW. The sorting was carried out with a 70 µm nozzle at a pressure  
194 of 60 PSI and a differential pressure with the sample of 0.3-0.4 PSI. The sheath liquid NaCl  
195 0.9% (REVOL, France) was filtered on a 0.04 µm filter. The analyses were on the SSC  
196 parameter of laser 561, with threshold set to 0.012% in order to have maximum 300 eps. An  
197 M2 mask was added in front of the FSC. All SSC and FSC parameters are viewed in  
198 logarithmic mode. The calibration of the machine was carried out using Megamix-Plus SSC  
199 beads from BioCytex. We used the Trucount™ Tubes to normalize the EV counting for ConA  
200 labelling, and the fluorescence of the Mab18B7 and alexa 488 conjugated, and beads  
201 Trucount™ was measured on parameter 488-513/26. Control conditions including  
202 ultracentrifuge washed PBS, previously incubated with ConA were used to evaluate the PBS  
203 associated noise and to normalize labelling percentages. Flow Cytometry data were analyzed  
204 by FlowJo V10 Software.

205

#### 206 **Nanoparticle tracking analysis (NTA)**

207 Quantitative determination of EV size distribution was performed by NTA, in addition  
208 to microscopic methods. Protocols that were recently established for the analysis of  
209 cryptococcal EVs were used (Reis et al. 2019). Briefly, ultracentrifugated pellets were 20- to  
210 50-fold diluted in filtered PBS and measured within the optimal dilution range of  $9 \times 10^7$  to  
211  $2.9 \times 10^9$  particles/mL on an LM10 nanoparticle analysis system, coupled with a 488-nm laser  
212 and equipped with an sCMOS camera and a syringe pump (Malvern Panalytical, Malvern,  
213 United Kingdom). The data were acquired and analyzed using the NTA 3.0 software (Malvern  
214 Panalytical).

215

#### 216 **Cryo-EM and cryo-ET**

217 EVs (4µL) were spotted on glow-discharged lacey grids (S166-3, EMS) and cryo-  
218 fixed by plunge freezing at -180°C in liquid ethane using a Leica EMGP (Leica, Austria).  
219 Grids were observed either with Tecnai F20, or Titan Krios (Thermo Fisher Scientific). The  
220 Tecnai F20 (Thermo Fisher Scientific) was operating at 200kV and images were acquired  
221 under low-dose conditions using the software EPU (Thermo Fisher Scientific) and a direct  
222 detector Falcon II (Thermo Fisher Scientific).

223 Cryo-electron tomography was performed using 5 nm protein-A gold particles (UMC,  
224 Utrecht). These were mixed with the sample to serve as fiducial markers for subsequent image  
225 alignment. EV sample (4 µL) was applied to glow discharged Lacey grids (S166-3, EMS)  
226 prior plunge-freezing (EMGP, Leica). Initial bi-directional tilt series acquired using a

227 TECNAI F20 transmission electron microscope (FEI) operated at 200kV under parallel beam  
228 conditions using a Gatan 626 side entry cryoholder. The SerialEM software (Mastronarde  
229 2005, Schorb et al. 2019) was used to automatically acquire images every  $2^\circ$  over a  $\pm 45^\circ$   
230 range using a Falcon II direct detector with a pixel size of  $2 \text{ \AA}$ , using a total dose of 180  
231 electrons per  $\text{\AA}^2$ . At least 100 EV cryo-EM images obtained from TECNAI F20 were used for  
232 measuring EV diameter and decoration thickness in wild type (WT) and mutant strains. For  
233 each EV, an average of three different measurements were used to calculate the diameter  
234 (delimited by the lipid bilayer) and the decoration thickness.

235 Dose-symmetric tilt series were collected on a 300kV Titan Krios (Thermo Scientific)  
236 transmission electron microscope equipped with a Quantum LS imaging filter (Gatan, slit  
237 with  $20 \text{ eV}$ ), single-tilt axis holder and K3 direct electron detector (Gatan). Tilt series with  
238 an angular increment of  $2^\circ$  and an angular range of  $\pm 60^\circ$  were acquired with the Tomography  
239 software (Thermo Scientific). The total electron dose was between 120 and 150 electrons per  
240  $\text{\AA}^2$  and the pixel size at  $3.38 \text{ \AA}$ . Dose symmetric tilt series were saved as separate stacks of  
241 frames and subsequently motion-corrected and re-stacked from  $-60^\circ$  to  $+60^\circ$  using IMOD's  
242 function align frames (Mastronarde and Held 2017) with the help of a homemade bash script.

243 Initial image shifts were estimated using IMOD's function tiltcorr. Alignments were  
244 further optimized in IMOD using the tracing of 30-40 gold fiducials across the tilt series. The  
245 fiducial models gave an overall of a fiducial error around  $6 \pm 2.7 \text{ \AA}$ . In cases of a higher error,  
246 local alignments were taken into consideration, to further correct the sample's beam induced  
247 motion observed. Three-dimensional reconstructions were calculated in IMOD by weighted  
248 back projection using the SIRT-like radial filter to enhance contrast and facilitate subsequent  
249 segmentation analysis.

250

### 251 **EV-modeling and analysis of tomographic data**

252 Tomograms were displayed and analyzed using the 3dmod interface of IMOD  
253 (Kremer et al. 1996). EVs were modeled with manual tracing of their great circle prior the use  
254 of the spherical interpolator of IMOD. If the elliptical contours calculated could not follow the  
255 vesicular membrane adequately, further manual tracing was used before re-applying the  
256 interpolator. This involved tracing of membranes near the poles of the vesicles where the  
257 membrane information could still be followed. To evaluate and assign diameters to a total of  
258 434 *C. neoformans* regular vesicles, located in 39 tomograms, the value of the perimeter of  
259 the spheroid's great circle was extracted using the imodinfo function of IMOD, from the same  
260 initial manually traced contours used for modelling. To display in 3D the vesicle contour data



261 were meshed using the imodmesh function of IMOD. The projections of the 3D spheroidal  
262 models were displayed and rotated to study their 3D geometry.

263 For the evaluation of the decoration thickness, regular vesicles were analyzed by  
264 manually measuring the outer EV diameter (delimited by the fibrillar decoration) and the  
265 inner diameter (delimited by the lipid bilayer), across the longest axis of the vesicle. The final  
266 calculation of the decoration thickness was the subtraction of the inner diameter from the  
267 outer diameter, divided by two. For the modeling of the fibrillar decoration, the IMOD surface  
268 models were imported to UCSF Chimera (Pettersen et al. 2004). The models were used as  
269 masks to extract a slab of data around their outer surface, corresponding to the decoration.  
270 The thickness of the slab used refers to the mean value provided by the aforementioned  
271 manual analysis. Iso-surface representation of the decoration and final 3D data visualization  
272 of the models performed with UCSF Chimera (Pettersen et al. 2004).

273

#### 274 **Immunization assays**

275 The animal experiments were approved by the ethical committee for animal experimentation  
276 Comité d'Éthique en Experimentation Animale (CETEA Project license number 2013-0055).  
277 Six-week old female BALB/c mice (Janvier Labs) were used for immunization study. The  
278 amount of EVs, in protein concentration, was determined by BCA method prior to  
279 immunization. Following, three intraperitoneal injections (fixing protein concentration in the  
280 EVs to either 1 or 10 µg and suspending in 100 µL PBS) at 15-day intervals were given to the  
281 mice. The control group of mice was injected only with PBS. Blood was collected from the  
282 submandibular veins of the mice three days after the last immunization and just before the  
283 fungal infection and tested for antibody response by Western blot. Briefly, the EVs-associated  
284 proteins were separated on 12% SDS-PAGE, and electroblotted to nitrocellulose membrane.  
285 By Western blotting, using the mouse sera at dilution 1:1000 and anti-mouse IgG antibody  
286 conjugated to peroxidase (Sigma Aldrich), the antibody response specific to the EV-  
287 associated proteins was examined. Once the antibody response was confirmed, all the  
288 immunized and control mice were challenged intranasally, around one month from the last  
289 immunization, with  $1 \times 10^4$  cells of *C. neoformans* wild-type strain, and their body weights  
290 and survival were monitored until all mice succumbed to the infection. The immunization  
291 assay was performed in two biological replicates.

292

#### 293 **Vesicle denaturation and protein digestion**

294 EVs proteins were solubilized in urea 8 M, Tris 100 mM pH 7.5, 5 mM tris (2-  
295 carboxyethyl) phosphine (TCEP) for 20 min at 23°C. Samples were sonicated using a  
296 Vibracell 75186 and a miniprobe 2 mm (Amp 80% // Pulse 10 off 0.8, 3 cycles). Proteins  
297 were then alkylated with 20 mM iodoacetamide for 30 min at room temperature in the dark.  
298 Subsequently, LysC (Promega) was added for the first digestion step (protein to Lys-C ratio =  
299 80:1) for 3h at 30°C. Then samples were diluted down to 1 M urea with 100 mM Tris pH 7.5,  
300 and trypsin (Promega) was added to the sample at a ratio of 50:1 for 16h at 37°C. Proteolysis  
301 was stopped by adding Formic acid (FA) to a final concentration of 1 % (vol/vol). Resulting  
302 peptides were desalted using Sep-Pak SPE cartridge (Waters) according to manufactures  
303 instructions.

304

### 305 **LC-MS/MS of tryptic digest**

306 LC-MS/SM analysis of trypsin-digested proteins (peptides) was performed on an  
307 Orbitrap Q Exactive Plus mass spectrometer (Thermo Fisher Scientific, Bremen) coupled to  
308 an EASY-nLC 1200 (Thermo Fisher Scientific). A home-made column was used for peptide  
309 separation [C<sub>18</sub> 40 cm capillary column picotip silica emitter tip (75 µm diameter filled with  
310 1.9 µm Repronil-Pur Basic C<sub>18</sub>-HD resin, (Dr. Maisch GmbH, Ammerbuch-Entringen,  
311 Germany)]. It was equilibrated and peptide was loaded in solvent A (0.1 % FA) at 900 bars.  
312 Peptides were separated at 250 nL.min<sup>-1</sup>. Peptides were eluted using a gradient of solvent B  
313 (ACN, 0.1% FA) from 3% to 22 % in 160 min, 22% to 50% in 70 min, 50% to 90% in 5 min  
314 (total length of the chromatographic run was 250 min including high ACN level step and  
315 column regeneration). Mass spectra were acquired in data-dependent acquisition mode with  
316 the XCalibur 2.2 software (Thermo Fisher Scientific, Bremen) with automatic switching  
317 between MS and MS/MS scans using a top-10 method. MS spectra were acquired at a  
318 resolution of 70000 (at *m/z* 400) with a target value of  $3 \times 10^6$  ions. The scan range was  
319 limited from 300 to 1700 *m/z*. Peptide fragmentation was performed using higher-energy  
320 collision dissociation (HCD) with the energy set at 27 NCE. Intensity threshold for ions  
321 selection was set at  $1 \times 10^6$  ions with charge exclusion of  $z = 1$  and  $z > 7$ . The MS/MS spectra  
322 were acquired at a resolution of 17500 (at *m/z* 400). Isolation window was set at 1.6 Th.  
323 Dynamic exclusion was employed within 45 s.

324

### 325 **Data processing**

326 Data were searched using MaxQuant (version 1.5.3.8 and 1.6.6.0) (Cox and Mann  
327 2008, Tyanova et al. 2016) using the Andromeda search engine (Cox et al. 2011) against

328 home-made databases. The following databases were used. For *C. neoformans* KN99 $\alpha$ , *C.*  
329 *deneoformans* JEC21 and *C. deuterogattii* R265 we used the recently updated proteomes  
330 (Wallace et al. 2020, Gröhs Ferrareze et al. 2021). The following search parameters were  
331 applied: carbamidomethylation of cysteines was set as a fixed modification, oxidation of  
332 methionine and protein N-terminal acetylation were set as variable modifications. The mass  
333 tolerances in MS and MS/MS were set to 5 ppm and 20 ppm respectively. Maximum peptide  
334 charge was set to 7 and 7 amino acids were required as minimum peptide length. A false  
335 discovery rate of 1% was set up for both protein and peptide levels. The iBAQ intensity was  
336 used to estimate the protein abundance within a sample (Schwanhäusser et al. 2011).

337

### 338 **Statistical analysis**

339 All statistical analyses were performed using GraphPad Prism 8 software (GraphPad  
340 Software Inc.). Data sets were tested for normal distribution using Shapiro-Wilk or  
341 Kolmogorov-Smirnov normality tests. In the cases in which the data passed the normality test,  
342 they were further analyzed using the unpaired Student's t test or ordinary one-way ANOVA.  
343 When at least one data set was nonnormally distributed, we used the nonparametric  
344 Kolmogorov-Smirnov or Kruskal-Wallis test. For the comparison of the survival curves, we  
345 used the Logrank (Mantel-Cox) test.

346

347

## 348 **3. Results**

349

### 350 **- Diversity of cryptococcal EVs**

351 Several groups have performed morphological studies of fungal EVs by electron  
352 microscopy (Rodrigues et al. 2007, Oliveira et al. 2009, Rayner et al. 2017, Bleackley et al.  
353 2020). However, most of these studies used sample fixation-dehydration procedures for  
354 transmission electron microscopy (TEM), which can often affect the size and morphology of  
355 EVs (Van Der Pol et al. 2010, Chiang and Chen 2019). Cryo-EM imaging on rapidly-frozen  
356 samples at low temperature could potentially reduce sample damaging and artifacts caused by  
357 the addition of heavy metals, dehydration, or fixation steps (Orlov et al. 2017, Chiang and  
358 Chen 2019). Indeed, diverse morphologies of EVs derived from even a single mammalian cell  
359 type have been clearly revealed under cryo-EM (Zabeo et al. 2017). We therefore used cryo-  
360 EM and cryo-ET to analyze EVs purified from *C. neoformans*, in their near-native state.

361 Based on the optimized version of the EV purification protocol recently described by  
362 Reis and collaborators (Reis et al. 2019), we isolated EVs from *C. neoformans* reference  
363 strain KN99 $\alpha$ , cultured on synthetic dextrose solid medium for 24h, in order to limit the  
364 carryover of potential contaminants. Cryo-ET tomograms allowed us to analyze 533 single  
365 vesicles, which were characterized according to their morphological aspects in regular (round-  
366 bilayered vesicles) and irregular (not rounded, bi- or multilayered vesicles) categories.  
367 Although a large proportion (81.4%) of the observed EVs had the typical round shape, 18.6%  
368 corresponded to irregular morphologies. Among them, we observed examples of multilayered  
369 vesicles, long tubular, flat, short tubular and miscellaneous morphologies (**Fig. S1; Table S2**).  
370 However, it remains to be determined whether EVs with irregular morphologies are produced  
371 biologically or they appear as a consequence of the purification method.

372 Cryo-EM analysis showed a considerable polymorphism of EVs, with the two leaflets  
373 of the typical vesicular membrane readily visible for all EVs observed, and a few unstructured  
374 aggregates, thus confirming the quality of our preparation (**Fig. 1A**). In *C. neoformans*,  
375 among the regular vesicles, only 10.8% appeared to have a smooth surface (**Fig. 1B and 1C**);  
376 the majority of regular EVs (89.2%) were decorated with a fibrillar structure anchored to the  
377 lipid bilayer (**Fig. 1D and 1E**). Strikingly, regardless of the morphology, the majority of EVs  
378 analyzed (88.6%) appeared to be coated with this fibrillar material. We used cryo-ET to  
379 prepare a three-dimensional surface model of the EVs, using IMOD (Mastronarde and Held  
380 2017) and UCSF Chimera (Pettersen et al. 2004) to further visualize their structure and  
381 fibrillar decoration (**Fig. 1F to 1H**).

382 Additional aspects of *C. neoformans* EV diversity, such as the distribution of size and  
383 decoration, were analyzed. NTA analyses showed a diameter size distribution from 80 to 500  
384 nm and revealed a major peak of vesicle detection in the 150-nm-diameter range (**Fig. 2A**), in  
385 line with previous findings (Reis et al. 2019). We also analyzed the EV diameter frequency  
386 distribution by cryo-EM from 434-single regular EV captures (**Fig. 2B**). The size distribution  
387 of vesicles tracked with NTA was different from the distribution of vesicles observed with  
388 cryo-EM, which revealed a wider range of EV diameter size, ranging from as small as 10 nm  
389 to 500 nm (**Fig. 2C; Video S1**). Notably, smaller vesicles (< 100 nm) comprised a higher  
390 proportion of vesicles captured by cryo-EM than by NTA. Although cryo-EM has some  
391 statistical limitations, it nonetheless confirms the known bias of NTA towards larger EVs  
392 (Bachurski et al. 2019).

393 Analysis of the EV size according to the presence or absence of the surface decoration  
394 revealed a different frequency distribution (**Fig. 2D**), with non-decorated EVs showing a

395 significantly smaller size distribution ( $p = 0.01$ , using nonparametric Kolmogorov-Smirnov  
396 test) compared to the decorated ones (**Fig. 2E**). Additionally, the analysis of the vesicular  
397 decoration in 105 single regular EVs revealed heterogeneity in their thickness, ranging from 5  
398 to 23 nm with the average value close to 16 nm (**Fig. 2F**). There was no correlation between  
399 vesicular diameter size and decoration thickness, as indicated by linear regression analysis  
400 (**Fig. 2G**). Therefore, the presence or absence of decoration, and even its thickness, does not  
401 depend on the size and shape of the EVs, revealing a previously unknown aspect of fungal EV  
402 diversity.

403

404 We analyzed EVs from two other pathogenic species of *Cryptococcus*, *C.*  
405 *deneoformans* strain JEC21 and *C. deuterogattii* strain R265. As expected, cryo-EM revealed  
406 a similar structure of the EV population in the three *Cryptococcus* species, the majority of  
407 EVs being decorated in *C. deneoformans* (72.4 %) and *C. deuterogattii* (81.4 %) (**Table S2**).  
408 In contrast, *C. deuterogattii* EVs appeared to be smaller (median size = 48 nm) than those of  
409 *C. neoformans* (median size = 67 nm) and *C. deneoformans* (median size = 70 nm) (**Fig. 3A**).  
410 In addition, the thickness of decoration is smaller in *C. deneoformans* and *C. deuterogattii*  
411 than in *C. neoformans* (**Fig. 3B**), suggesting a tight genetic control of these EV structural  
412 properties (**Fig. 3C, Fig. S2**).

413

#### 414 - *Cryptococcus* EVs structural analysis

415 *C. neoformans* is an encapsulated microorganism, and its capsule is mostly composed  
416 of the polysaccharide glucuronoxylomannan (GXM), a critical virulence factor of this  
417 pathogenic yeast (O'Meara and Alspaugh 2012). GXM has been previously shown to be  
418 exported by EVs (Rodrigues et al. 2007). Therefore, we reasoned that the fibrillar decoration  
419 observed around the vesicles could be composed of GXM. We thus incubated *C. neoformans*  
420 EVs with the Alexa 488 labelled anti-GXM monoclonal antibody 18B7 (Casadevall et al.  
421 1992), and analyzed the EV suspension by flow cytometry. More than 70% of the EVs  
422 obtained from the wild-type strain were recognized by this antibody (**Fig. 4A**), suggesting that  
423 most *C. neoformans* EVs are covered to some extent with GXM or derivatives thereof. While,  
424 EVs obtained from the acapsular mutant strain (*cap59Δ*) (Moyrand et al. 2007) showed  
425 negligible labelling (2.33%), following the same experimental approach (**Fig. 4B**).  
426 Nevertheless, cryo-EM observation of *cap59Δ* EVs revealed similar fibrils as observed in the  
427 wild type EVs (**Fig. 4B**). Moreover, cryo-EM analysis of EVs purified from *cap59Δ*  
428 suggested a similar percentage of decorated EVs (91.6%). Overall, these data suggest that,

429 even though GXM covers most *C. neoformans* EVs, the visible fibrillar structures around  
430 them are not GXM-based. Cryo-EM analysis of EVs obtained from *C. albicans* SC5314 and  
431 *S. cerevisiae* S288C grown on SD medium showed a similar fibrillar decoration observed  
432 around *Cryptococcus* EVs (**Fig. 4C**), reinforcing the notion that this structure is not GXM-  
433 based, since neither of these two yeasts can synthesize this capsular polysaccharide.

434 We then reasoned that EV decoration could be protein-based and therefore performed  
435 proteomic analyses to further explore this novel fungal vesicular feature. Two proteomic  
436 analyses of *C. neoformans* EVs have been reported previously (Rodrigues et al. 2008, Wolf et  
437 al. 2014) wherein the authors identified 92 and 202 proteins associated with EVs in *C.*  
438 *neoformans*, respectively. However, neither quantitative nor enrichment of EV-associated  
439 proteins was performed in these two studies. Therefore, we performed EV proteomic  
440 characterization, together with an enrichment analysis in order to distinguish the proteins  
441 associated with EVs, from those related to potential carry-over aggregates, inevitably  
442 contaminating EV preparations.

443 In fungi, and more specifically in *Cryptococcus*, the relationship between RNA and  
444 protein abundances has been reported as nearly linear, due to the relatively minor contribution  
445 of posttranscriptional regulations to protein abundance (Wallace et al. 2020). We thus used  
446 cellular RNA abundance at 30°C, exponential phase (Wallace et al. 2020), as a proxy for  
447 cellular protein abundance, and for normalization of EV proteome data. *C. neoformans* EVs  
448 proteomic analysis was performed in experimental triplicate that produced a common list  
449 containing 1847 proteins (**Table S3**). Proteins were ranked according to their prevalence in  
450 the sample evaluating the average intensity-based absolute quantification (IBAQ) value of the  
451 three replicates. We then used the gene expression level as evaluated by RNA-seq analysis to  
452 calculate an enrichment coefficient comparing the expected value in the cells with the  
453 observed one in EVs. We thus identified 39 non-ribosomal proteins which were present both  
454 within the 100 most prevalent EV proteins overall and the 100 most enriched proteins (**Table**  
455 **S4**). We considered these proteins as EV-associated proteins. Only 9 out of these 39 proteins  
456 were reported in previous proteomic analysis, emphasizing the necessity for proteomic data  
457 enrichment analysis. Of note, our study and those published before used different culture  
458 media, and distinct protocols of EV isolation, which might also explain the differences in  
459 protein composition that were presently observed.

460 To further explore how conserved the EV protein cargo across *Cryptococcus* species  
461 is, we proceeded with the same strategy to characterize the EV-associated proteins in two  
462 other cryptococcal species, *C. deneoformans* (strain JEC21) and *C. deuterogattii* (strain

463 R265). We identified 38 and 48 EV-associated proteins for *C. deneoformans* and *C.*  
464 *deuterogattii*, respectively (**Table S3; Table S4**). Overall, 71 EV-associated proteins were  
465 identified, 37 in at least two species, and 17 shared by all the three species (**Fig. 5A and B**),  
466 supporting a conserved profile of the EV-associated proteins across *Cryptococcus* species,  
467 and the robustness of our analyses. Several families of proteins appeared to be typical of  
468 *Cryptococcus* EVs. The major one was the Chitin deactylase Cda family (Baker et al. 2011),  
469 composed of three members present among the 17 EV-associated proteins identified in all  
470 three *Cryptococcus* species analyzed. Some other families like the putative glyoxal oxidase  
471 (Gox proteins), or the Ricin-type beta-trefoil lectin domain-containing protein (Ril), have one  
472 member common to all three species EVs (i.e. Gox2 and Ril1) whereas the other members are  
473 found in only two species (Ril2 and Ril3) or are specific of one species EVs (Gox1 and Gox3)  
474 (**Fig. 5C**). We also identified three tetraspanin membrane proteins containing a SUR7/PalI  
475 family motif. Tsh1 and Tsh2 shared 32% identity in their amino acid sequence. Tsh1 is  
476 present in both *C. neoformans* and *C. deneoformans* EVs whilst Tsh2 was identified in both  
477 *C. neoformans* and *C. deuterogattii*. The third Sur7/PalI protein shares very little sequence  
478 homology beyond the SUR7 motif and is exclusive to *C. deuterogattii*. Two Sur7 proteins  
479 have been recently identified in *C. albicans* EVs, suggesting that they might represent a  
480 common EV marker present in fungal EVs (Dawson et al. 2020). Finally, two members of the  
481 previously described pr4/barwin domain Blp protein family (Chun et al. 2011) were present in  
482 *C. neoformans* and *C. deuterogattii* EVs but not in *C. deneoformans*. Similarly, the two  
483 ferroxidase Cfo proteins (Jung et al. 2008) were shown to be associated only with the *C.*  
484 *deuterogattii* EVs but not in the two other species.

485 Several enzymes associated with polysaccharide degradation and modifications were  
486 present in *Cryptococcus* EVs. Some of these proteins are specific to one species but others are  
487 present in two or all three EV proteomes. For instance, identification within the *Cryptococcus*  
488 EV core proteins of Gas1 (a 1,3-beta-glucanosyltransferase), Amy1 (an alpha amylase),  
489 Exg104 (a glucan 1,3-beta-glucosidase), Hep2 (a putative heparinase) together with the Gox,  
490 Cda and Ril proteins suggest functions of EVs in cell wall processes, as previously  
491 hypothesized in *S. cerevisiae* (Zhao et al. 2019). We also identified the BCS-inducible  
492 membrane protein (Bim1), recently described as a critical factor for copper acquisition in *C.*  
493 *neoformans* meningitis (Garcia-Santamarina et al. 2020). Finally, several of the EV proteins  
494 identified here have no predicted function; we therefore named them Vep (Vesicles enriched  
495 protein). Bioinformatics analysis of the 71 EV-associated protein sequences suggested that  
496 80% might be membrane-bound, 36 of them bearing at least one putative transmembrane

497 domain as predicted by SignalP-5.0 (Almagro Armenteros et al. 2019) and/or TMHMM v. 2.0  
498 (Krogh et al. 2001), and 21 being putative GPI-anchored proteins as predicted by PredGPI  
499 (Pierleoni et al. 2008), which is in good agreement with putative protein-based decoration.  
500 Reflecting the general specificities of these three proteomes, the GPI-anchor EV-proteomes of  
501 *C. neoformans* and *C. deneoformans* are nearly identical, whereas *C. deuterogatii* is more  
502 diverse (**Fig. 5D**).

503 Mature GPI-anchored proteins can also be membrane-bound and are predicted to be  
504 highly mannosylated in *Cryptococcus* and other fungi (Levitz et al. 2001, de Groot et al.  
505 2003). We thus reasoned that these mannosylated proteins might represent the EV decorations  
506 observed by cryo-EM. To test this hypothesis, we incubated EVs with ConA conjugated to  
507 Alexa Fluor 488, and further analyzed by flow cytometry. Our results demonstrated that over  
508 98.5% of vesicles were recognized by this lectin, confirming the presence of mannosylated  
509 proteins on the EV surface (**Fig. 6**). Similarly, EVs obtained from acapsular *cap59Δ* mutant  
510 strain also showed a high percentage of staining (95.5%). Accordingly, EV treatment with  
511 proteinase K was associated with a nearly complete loss of ConA labelling of both WT and  
512 *cap59Δ* EVs (**Fig. 7**), overall suggesting that the outer vesicle decoration may be composed  
513 primarily of mannoproteins.

514 Several genes have been implicated in protein glycosylation in *C. neoformans*. For  
515 instance, *ALG3* encodes a dolichyl-phosphate-mannose-dependent  $\alpha$ -1,3-mannosyltransferase,  
516 deletion of which is associated with the production of truncated protein-associated neutral *N*-  
517 glycans and a reduction in virulence (Thak et al. 2020). Similarly, *KTR3* and *HOC3* encodes  
518  $\alpha$ 1,2-mannosyltransferase and  $\alpha$ 1,6-mannosyltransferase, respectively, regulating *O*-glycan  
519 structure and pathogenicity of *C. neoformans* (Lee et al. 2015). We reasoned that the deletion  
520 of some of these genes could alter EV production and structure. We first analyzed EV  
521 production in *alg3Δ*, *hoc3Δ*, and *ktr3Δ* strains by evaluating the quantity of sterol in our EV  
522 preparations. We did not observe any significant alternation in EV production nor in the  
523 percentage of ConA positive EVs in any of these deletion mutants (**Fig. 8A, 8B**).  
524 Nevertheless, the percentage of *alg3Δ* EVs labelled by ConA was slightly reduced (**Fig. 8B**)  
525 and *alg3Δ* EV decorations were less thick than wild type EVs, as revealed by cryo-EM  
526 observation (**Fig. 8C, 8D; Table S2**).

527 The two most abundant *C. neoformans* EV proteins, Mp88 and Vep1/CNAG\_03223  
528 are GPI-anchored and represent 23.7% of the total identified proteins. Mp88 is a  
529 basidiomycete specific protein originally identified as a major *C. neoformans* immunoreactive  
530 mannoprotein stimulating T cell responses (Huang et al. 2002). Vep1 (Vesicles Enriched



531 Protein 1) is protein of unknown function sharing no homology with any *C. albicans* or *S.*  
532 *cerevisiae* protein. In all three *Cryptococcus* species, Mp88 (Huang et al. 2002) was the most  
533 prevalent EV protein. In *C. deuterogattii* EVs, in which the Vep1 protein is not present, Mp88  
534 represents 35.4% of all EV proteins. We constructed the corresponding single and double  
535 mutant strains for *MP88* and *VEP1* and tested their EVs for ConA binding. These mutations  
536 did not strongly affect EV production although *MP88* deletion was associated with a slight  
537 increased production as compared to the wild type strain (**Fig. 8A**). However, both *mp88Δ*  
538 and *mp88Δ vep1Δ* EVs displayed a limited but statistically significant reduction of the ConA-  
539 bound EVs as compared to EVs from wild-type strain (**Fig. 8B**). Accordingly, cryo-EM  
540 analysis of *mp88Δ* EVs revealed an associated reduction of the decoration thickness (**Fig.8C,**  
541 **8D**) without any change in EV size distribution (**Fig. 8C; Table S2; Fig. S2**) suggesting that  
542 cryptococcal EVs might bear a highly complex decoration, probably formed from a dynamic  
543 combination of mannoproteins. Combining all these data, we propose a model for cryptococcal  
544 EV structure, in which, EVs are decorated by mannosylated proteins and covered by GXM  
545 (**Fig. 9**).

546

#### 547 - *EVs for immunization and protection against cryptococcal infection*

548 Proteomic analysis of the *C. neoformans* EVs identified many immunogenic proteins,  
549 including Mp88, the members of Gox and Cda families and some Vep proteins previously  
550 tested as vaccine candidates against cryptococcosis (Specht et al. 2017, Hester et al. 2020).  
551 Moreover, some of these proteins were also found to be enriched in *C. deneoformans* and *C.*  
552 *deuterogattii* EVs (Mp88, Cda1, Cda2, Cda3, and Gox2), suggesting that secretion of these  
553 immunogenic molecules via EVs could be a conserved feature across different species.  
554 Taking into account that cryptococcal EVs have been shown to be immune modulators  
555 (Freitas et al. 2019) and may impact the pathophysiology of the infection (Bielska et al. 2018,  
556 Hai et al. 2020), we reasoned that EVs could be used for immunization against  
557 cryptococcosis, avoiding the need for recombinant protein purification and adjuvant usage.  
558 The usage of fungal EVs has been previously suggested as a promising vaccine strategy  
559 (Vargas et al. 2015, Colombo et al. 2019, Freitas et al. 2019, Vargas et al. 2020). However, to  
560 date cryptococcal EVs have not been tested in murine infection models.

561 In a pilot experiment, we obtained EVs from *C. neoformans* wild-type strain and the  
562 acapsular *cap59Δ* mutant, used them to immunize BALB/c mice in two different EV-protein  
563 dosages (1 and 10 μg) via intraperitoneal injections; control group was injected with only PBS  
564 (four mice in each group). After three immunizations, anti-EV-antibody response was

565 evaluated in the mouse sera. Regardless of the EV origin, all the immunized mice produced  
566 antibodies against vesicular proteins, as revealed by Western Blot (**Fig. 10A**). Forty days after  
567 the last immunization, mice were challenged intranasally with *C. neoformans* wild type strain  
568 ( $1 \times 10^4$  yeasts per mouse), and their survival were monitored post-infection. All EV-  
569 immunized mice survived longer than the non-immunized ones and immunization with both  
570 doses of *cap59Δ* EVs statistically significantly prolonged the survival of the mice (**Fig. 10B**)  
571 To note, the total carbohydrate per 100 μg of EV-proteins were approximately 22 μg and 3  
572 μg, respectively, for wild-type and *cap59Δ* mutant, as analyzed by gas-chromatography  
573 analyses (Richie et al. 2009). We then confirmed this result using a larger number of mice (10  
574 mice per group). Since the highest dose of EVs from the acapsular mutant rendered the best  
575 protection, we decided to proceed only with EVs from *cap59Δ* strain (10 μg per mouse). After  
576 immunizations with EVs, the anti-EV-antibody response in the mice was analyzed; all  
577 immunized mice produced antibodies against vesicular molecules (**Fig. 10C**). Following, the  
578 mice were challenged with *C. neoformans* wild type strain ( $1 \times 10^4$  yeasts per mouse), and  
579 their survival was monitored post-infection. EV-immunization led to a significant prolonged  
580 survival ( $p = 0.0006$ ) (**Fig. 10D**), thus confirming the promising potential usage of EV-based  
581 protection against *Cryptococcus*.

582

#### 583 **4. Discussion**

584 Studies on fungal EVs have gained much attention during recent years (Rizzo et al. 2020).  
585 Although data from both pathogenic and nonpathogenic species highlight their importance in  
586 diverse biological contexts, knowledge on fungal EVs is still limited, mostly due to their  
587 nanometer size and the technical hurdles intrinsic to the methods applied for their  
588 characterization (Rizzo et al. 2020). Here we used cutting edge technologies to revisit  
589 *Cryptococcus* EVs. Our cryo-EM analysis produced an unprecedented quality of EV images  
590 and resolved the fibrillar structure decoration as a new aspect on fungal EVs.

591 Our hypothesis is that EV decoration is not capsular polysaccharide GXM-based but  
592 mainly composed of mannoproteins. This is supported by two independent experiments. First,  
593 we demonstrated that although GXM most probably surrounds the vesicles, it is not necessary  
594 for the presence of decoration. Thus, EVs produced by an acapsular strain of *C. neoformans*  
595 are not bound by a GXM specific antibody yet still display decoration. Secondly, *C. albicans*  
596 and *S. cerevisiae* EVs are also decorated, although none of these yeasts produced a capsular  
597 polysaccharide. Nonetheless, our study revealed that the deletion of single mannoproteins,

598 such as the GPI-anchored proteins Mp88 and Vep1, was not sufficient to completely remove  
599 the EV decoration, suggesting that this structure has a highly complex and dynamic  
600 composition, including several mannoproteins.

601 Indeed, previous reports in *C. albicans* showed that the role of GPI-anchored proteins  
602 are redundant and single mutants mostly displayed minor phenotypes, if any (Plaine et al.  
603 2008). Interestingly, Johansson and coworkers performed cryo-EM analysis of *Malassezia*  
604 *sympodialis* EVs, demonstrating no (Johansson et al. 2018) evident decoration on their  
605 surfaces (Johansson et al. 2018). Comparative genomic analysis suggested that this lipophilic  
606 pathogenic yeast, living on the skin (Theelen et al. 2018), lacks the N-glycosylation pathway  
607 and possesses only a very small number of GPI-anchor proteins (Gioti et al. 2013).  
608 Accordingly, *M. sympodialis* cells lack the extensive mannan outer fibrillar layer, which can  
609 be easily observed at the surface of the cell wall of most yeasts including *S. cerevisiae* or *C.*  
610 *albicans* (Gioti et al. 2013, Muszewska et al. 2017). Therefore, it is very tempting to  
611 hypothesize that this absence of mannans in *M. sympodialis* could explain the absence of EV  
612 decoration, supporting the idea that EV decoration in *Cryptococcus* species is mannoprotein-  
613 based. Previous proteomic analysis of fungal EVs identified putative mannoproteins,  
614 suggesting that this decoration is a common feature of fungal EVs (Bleackley et al. 2019,  
615 Dawson et al. 2020, Karkowska-Kuleta et al. 2020, Rizzo et al. 2020). Accordingly, flow  
616 cytometry experiments showed that *C. glabrata* EVs can be labelled by ConA (Karkowska-  
617 Kuleta et al. 2020). Putative fibril-like structures have also been reported at the surface of  
618 *Aspergillus fumigatus* EVs produced during cell wall regeneration (Rizzo et al. 2020).

619 In addition, we performed proteome analysis of EVs from *S. cerevisiae* and *C.*  
620 *albicans* grown in the same conditions as *Cryptococcus* species, and confirmed the presence  
621 of number of cell wall and GPI-anchored proteins in their EVs (Vargas et al. 2015, Zhao et al.  
622 2019, Dawson et al. 2020). We also confirmed the presence of diverse antigenic proteins  
623 associated with EVs in *C. albicans*, reinforcing the notion that this feature might be a general  
624 aspect of pathogenic fungal EVs (**Table S5**). Whereas the presence of decoration seems to be  
625 a hallmark of fungal EV, it is not specific to this kingdom (Macedo-da-Silva et al. 2021).  
626 Although EVs bearing visible structures on their surface have not been commonly reported, a  
627 recent cryo-EM analysis of EVs derived from human breast cell lines overexpressing  
628 hyaluronan synthase 3-(HAS3) suggested the presence of fibril-like structures on their vesicle  
629 surface (Noble et al. 2020). Additionally, EVs from poliovirus-infected cells contain ‘protein  
630 structures with globular heads on a stalk’ around the membrane (Yang et al. 2020).

631 Nevertheless, it is still unclear how often this feature is present among the whole EV  
632 population, and what the composition of these surface structures is.

633 Previous studies explored the size and morphology of fungal EVs, mostly by  
634 techniques such as electron microscopy (TEM, SEM), dynamic light scattering (DLS), and  
635 NTA (Albuquerque et al. 2008, Rodrigues et al. 2008, Wolf et al. 2014, Vargas et al. 2015,  
636 Wolf et al. 2015, Bielska and May 2019). Here we show that cryptococcal EVs are more  
637 heterogeneous than previously recognized in terms of size distribution and morphotypes. Our  
638 cryo-EM analysis revealed that the peak of EV size distribution was smaller than 100 nm, and  
639 substantially different from size distribution observed by NTA and from that previously found  
640 from *C. neoformans* and *C. deuterogattii* EVs using NTA and DLS approaches (100 to 300  
641 nm) (Reis et al. 2019). Moreover, our study revealed not only the presence of regular EVs but  
642 also tubular, flat, and multilayered EVs. Although the different EV morphologies were  
643 previously identified in many fungal pathogens (Albuquerque et al. 2008, Rodrigues et al.  
644 2008, Tefsen et al. 2014, Vargas et al. 2015), some vesicular shapes found in this work have  
645 not previously been reported. Thus, membrane tubule structures (memtubs) budding from the  
646 plasma membrane were found in the arbuscular fungus *Rhizophagus irregularis*, suggesting  
647 that different shapes of membranous structures could appear during fungal growth (Roth et al.  
648 2019). Additionally, tubular and other morphologies were also found in EV populations  
649 obtained from human biological fluids (Arraud et al. 2014, Emelyanov et al. 2020). Although  
650 these data suggest that diverse structures could be part of the native EV population, the  
651 cellular origins of these structures are still unknown, and we cannot rule out the possibility of  
652 them being artifacts resulted from the filtration step of the commonly used EV isolation  
653 protocols.

654 In this study, we demonstrated that the three *Cryptococcus* species release both  
655 decorated and undecorated EVs, adding another previously unappreciated aspect to fungal EV  
656 diversity. As hypothesized before, this result also suggests the existence of at least two  
657 different pathways involved in EV biogenesis (Oliveira et al. 2010, Oliveira et al. 2013,  
658 Bielska and May 2019, Rizzo et al. 2020). It is, therefore, reasonable to hypothesize that  
659 decorated EVs could be shed from the fungal plasma membrane, “stealing” cell membrane  
660 proteins when they bud out. Interestingly, the decorated EVs have larger size distribution than  
661 the undecorated ones, in good agreement with what would be typical microvesicles in  
662 mammals. In this hypothesis, the enrichment of tetraspanin membrane proteins containing a  
663 SUR7/PaII family motif might indicate that decorated EVs could be specifically shed from the  
664 Sur7 specialized plasma membrane domains. This model could be extended to other fungi as

665 Sur7 proteins have been recently identified as EV-protein markers in *C. albicans* and in the  
666 wheat pathogen *Zymoseptoria tritici* (Dawson et al. 2020, Hill and Solomon 2020). This latter  
667 hypothesis, together with whether or not the smaller undecorated EVs are a result of the  
668 endosomal secretory pathways, thought to be exosomes being released by multivesicular  
669 bodies (MVB), still needs to be further explored. Interestingly, the characterization of  
670 decorated and undecorated EVs as microvesicles and exosomes, respectively, has previously  
671 been proposed (Noble et al. 2020). This hypothesis and our current results are supported by a  
672 recent study of *A. fumigatus* EVs in the absence of a cell wall. EVs were formed at the plasma  
673 membrane level and they contained a number of plasma membrane proteins (Rizzo et al.  
674 2020).

675 Our work suggests that cryptococcal EV cargo contains proteins involved in diverse  
676 biological processes, including Mp88 and members of Cda and Gox families, which have  
677 been suggested as immunomodulators (Specht et al. 2017, Hester et al. 2020). Since the novel  
678 surface structure on fungal EVs resolved by cryo-EM resembles the spike complexes on viral  
679 envelopes (Neuman et al. 2006, Zanetti et al. 2006), we reasoned they may be useful as a  
680 vaccine platform. Numerous efforts are underway to develop vaccines against fungal  
681 infections, although none have yet been approved for human use (Nami et al. 2019). It was  
682 previously shown that the pre-treatment of *Galleria mellonella* larvae with fungal EVs  
683 stimulated a protective response against a lethal challenge with *C. albicans*, *C. neoformans* or  
684 *A. fumigatus* (Vargas et al. 2015, Colombo et al. 2019, Brauer et al. 2020). More recently, it  
685 was also demonstrated that *C. albicans* EVs were also able to elicit a protective effect against  
686 murine candidiasis (Vargas et al. 2020). Interestingly, *C. neoformans* EVs show  
687 immunoreactivity with sera from patients with cryptococcosis, indicating that EV-associated  
688 proteins are produced during cryptococcal infection (Rodrigues et al. 2008). Prophylactic  
689 immunization is one of the effective methods to prevent cryptococcal infection, and several  
690 cryptococcal antigens have been tested for their vaccination potential (Caballero Van Dyke  
691 and Wormley 2018, Ueno et al. 2020). However, the *in vivo* immunoregulatory role of EVs  
692 have largely remained unknown (Robbins and Morelli 2014).

693 In our study, antibody responses in cryptococcal EV-immunized mice indicate that the  
694 EVs can elicit an adaptive immune response in the absence of any adjuvants or carriers,  
695 unlike other antigenic proteins of *Cryptococcus* (Specht et al. 2017). It is also important to  
696 note that immunization using *C. neoformans* heat-killed cells does not elicit protection in a  
697 murine model of infection (Masso-Silva et al. 2018). EV-based vaccination data obtained by  
698 other groups using an invertebrate model suggest that innate immunity might also be involved

699 (Vargas et al. 2015, Colombo et al. 2019). As *Cryptococcus* predominantly infects  
700 immunocompromised hosts, it will be worth checking the role of EVs in eliciting trained  
701 immunity, wherein innate immune cells develop memory-like response against an antigen  
702 upon repeated exposure (Hole et al. 2019, Mulder et al. 2019). The mechanisms, and the  
703 responsible immune cell types leading to prolonged survival in our murine infection model,  
704 remain to be deciphered. Although EV immunization was not sufficient to prevent death, we  
705 believe that adjusting the antigens exposed on EV surface could potentially increase the  
706 protective effect. In that sense, the fact that EVs from *C. neoformans* WT and the acapsular  
707 mutant did not lead to the same level of protection is an encouraging data.

708 Overall, the fantastic power of cryo-EM, together with several innovative analyses,  
709 has enabled us to draw a new model of fungal EVs and revealed new aspects of their  
710 diversity, suggesting different biosynthetic pathways. This model supports new strategies to  
711 construct vaccines against these too often neglected infectious diseases. It also opens the door  
712 to more questions concerning the origin and the fate of fungal EVs.

713

714

## 715 5. References

716

717 Albuquerque PC, Nakayasu ES, Rodrigues ML, Frases S, Casadevall A, Zancoppe-Oliveira RM, Almeida  
718 IC, Nosanchuk JD 2008. Vesicular transport in *Histoplasma capsulatum*: an effective mechanism for  
719 trans-cell wall transfer of proteins and lipids in ascomycetes. *Cell Microbiol* 10: 1695-1710.

720 Almagro Armenteros JJ, Tsirigos KD, Sønderby CK, Petersen TN, Winther O, Brunak S, von Heijne G,  
721 Nielsen H 2019. SignalP 5.0 improves signal peptide predictions using deep neural networks. *Nature*  
722 *Biotechnol* 37: 420-423.

723 Arraud N, Linares R, Tan S, Gounou C, Pasquet JM, Mornet S, Brisson AR 2014. Extracellular vesicles  
724 from blood plasma: determination of their morphology, size, phenotype and concentration. *Journal*  
725 *of Thrombosis and Haemostasis* 12: 614-627.

726 Bachurski D, Schuldner M, Nguyen P-H, Malz A, Reiners KS, Grenzi PC, Babatz F, Schauss AC, Hansen  
727 HP, et al. 2019. Extracellular vesicle measurements with nanoparticle tracking analysis - An accuracy  
728 and repeatability comparison between NanoSight NS300 and ZetaView. *J Extracell Vesicles* 8:  
729 1596016-1596016.

730 Baker LG, Specht CA, Lodge JK 2011. Cell Wall Chitosan Is Necessary for Virulence in the  
731 Opportunistic Pathogen *Cryptococcus neoformans*. *Eukaryot Cell* 10: 1264.

732 Bielska E, May RC 2019. Extracellular vesicles of human pathogenic fungi. *Curr Opinion Microbiol* 52:  
733 90-99.

734 Bielska E, Sisquella MA, Aldeieg M, Birch C, O'Donoghue EJ, May RC 2018. Pathogen-derived  
735 extracellular vesicles mediate virulence in the fatal human pathogen *Cryptococcus gattii*. *Nature Com*  
736 9: 1556-1556.

737 Bleackley MR, Dawson CS, Anderson MA 2019. Fungal extracellular vesicles with a focus on  
738 proteomic analysis. *PROTEOMICS* 19: 1800232.

739 Bleackley MR, Samuel M, Garcia-Ceron D, McKenna JA, Lowe RGT, Pathan M, Zhao K, Ang C-S,  
740 Mathivanan S, et al. 2020. Extracellular Vesicles From the Cotton Pathogen *Fusarium oxysporum* f.  
741 sp. *vasinfectum* Induce a Phytotoxic Response in Plants. *Frontiers in plant science* 10: 1610-1610.

742 Brauer VS, Pessoni AM, Bitencourt TA, de Paula RG, de Oliveira Rocha L, Goldman GH, Almeida F  
743 2020. Extracellular vesicles from *Aspergillus flavus* induce M1 polarization *in vitro*. *mSphere* 5:  
744 e00190-00120.

745 Caballero Van Dyke MC, Wormley FL, Jr. 2018. A Call to Arms: Quest for a Cryptococcal Vaccine.  
746 *Trends Microbiol* 26: 436-446.

747 Casadevall A, Mukherjee J, Devi SJN, Schneerson R, Robbins JB, Scharff MD 1992. Antibodies elicited  
748 by a *Cryptococcus neoformans*-tetanus toxoid conjugate vaccine have the same specificity as those  
749 elicited in infection. *The Journal of Infectious Diseases* 165: 1086-1093.

750 Chiang C-Y, Chen C 2019. Toward characterizing extracellular vesicles at a single-particle level. *J*  
751 *Biomed Sci* 26: 9-9.

752 Chiou N-T, Kageyama R, Ansel KM 2018. Selective Export into Extracellular Vesicles and Function of  
753 tRNA Fragments during T Cell Activation. *Cell Rep.* 25: 3356-3370.e3354.

754 Chun CD, Brown JCS, Madhani HD 2011. A major role for capsule-independent phagocytosis-  
755 inhibitory mechanisms in mammalian infection by *Cryptococcus neoformans*. *Cell host & microbe* 9:  
756 243-251.

757 Coakley G, McCaskill JL, Borger JG, Simbari F, Robertson E, Millar M, Harcus Y, McSorley HJ, Maizels  
758 RM, et al. 2017. Extracellular Vesicles from a Helminth Parasite Suppress Macrophage Activation and  
759 Constitute an Effective Vaccine for Protective Immunity. *Cell Rep.* 19: 1545-1557.

760 Colopy PD, Colot HV, Park G, Ringelberg C, Crew CM, Borkovich KA, Dunlap JC 2010. High-throughput  
761 construction of gene deletion cassettes for generation of *Neurospora crassa* knockout strains.  
762 *Methods Mol Biol* 638: 33-40.

763 Colombo AC, Rella A, Normile T, Joffe LS, Tavares PM, de S. Araújo GR, Frases S, Orner EP, Farnoud  
764 AM, et al. 2019. *Cryptococcus neoformans* glucuronoxylomannan and sterylglucoside are required for  
765 host protection in an animal vaccination model. *mBio* 10: e02909-02918.

766 Cox J, Mann M 2008. MaxQuant enables high peptide identification rates, individualized p.p.b.-range  
767 mass accuracies and proteome-wide protein quantification. *Nature Biotechnol* 26: 1367-1372.

768 Cox J, Neuhauser N, Michalski A, Scheltema RA, Olsen JV, Mann M 2011. Andromeda: A Peptide  
769 Search Engine Integrated into the MaxQuant Environment. *Journal of Proteome Research* 10: 1794-  
770 1805.

771 da Silva RP, Puccia R, Rodrigues ML, Oliveira DL, Joffe LS, César GV, Nimrichter L, Goldenberg S, Alves  
772 LR 2015. Extracellular vesicle-mediated export of fungal RNA. *Sci Rep* 5: 7763.

773 Dawson CS, Garcia-Ceron D, Rajapaksha H, Faou P, Bleackley MR, Anderson MA 2020. Protein  
774 markers for *Candida albicans* EVs include claudin-like Sur7 family proteins. *J Extracell Vesicles* 9:  
775 1750810.

776 de Groot PWJ, Hellingwerf KJ, Klis FM 2003. Genome-wide identification of fungal GPI proteins. *Yeast*  
777 20: 781-796.

778 Deatherage BL, Cookson BT 2012. Membrane Vesicle Release in Bacteria, Eukaryotes, and Archaea: a  
779 Conserved yet Underappreciated Aspect of Microbial Life. *Infect Immun* 80: 1948.

780 Eisenman HC, Frases S, Nicola AM, Rodrigues ML, Casadevall A 2009. Vesicle-associated melanization  
781 in *Cryptococcus neoformans*. *Microbiology* 155: 3860-3867.

782 Emelyanov A, Shtam T, Kamyshinsky R, Garaeva L, Verlov N, Miliukhina I, Kudrevatykh A, Gavrilov G,  
783 Zabrodskaya Y, et al. 2020. Cryo-electron microscopy of extracellular vesicles from cerebrospinal  
784 fluid. *PLOS ONE* 15: e0227949.

785 Fan Y, Lin X 2018. Multiple Applications of a Transient CRISPR-Cas9 Coupled with Electroporation  
786 (TRACE) System in the *Cryptococcus neoformans* Species Complex. *Genetics* 208: 1357.

787 Freitas MS, Bonato VLD, Pessoni AM, Rodrigues ML, Casadevall A, Almeida F 2019. Fungal  
788 Extracellular Vesicles as Potential Targets for Immune Interventions. *mSphere* 4: e00747-00719.

789 Garcia-Santamarina S, Probst C, Festa RA, Ding C, Smith AD, Conklin SE, Brander S, Kinch LN, Grishin  
790 NV, et al. 2020. A lytic polysaccharide monooxygenase-like protein functions in fungal copper import  
791 and meningitis. *Nat Chem Biol* 16: 337-344.

792 Gioti A, Nystedt B, Li W, Xu J, Andersson A, Averette AF, Münch K, Wang X, Kappauf C, et al. 2013.  
793 Genomic Insights into the Atopic Eczema-Associated Skin Commensal Yeast <em>Malassezia  
794 sympodialis</em>. *mBio* 4: e00572-00512.

795 Gonzalez-Hilarion S, Paulet D, Lee K-T, Hon C-C, Lechat P, Mogensen E, Moyrand F, Proux C, Barboux  
796 R, et al. 2016. Intron retention-dependent gene regulation in *Cryptococcus neoformans*. *Sci Rep* 6:  
797 32252.

798 Gröhs Ferrareze PA, Maufrais C, Silva Araujo Streit R, Priest SJ, Cuomo CA, Heitman J, Staats CC,  
799 Janbon G 2021. Application of an optimized annotation pipeline to the *Cryptococcus deuterogattii*  
800 genome reveals dynamic primary metabolic gene clusters and genomic impact of RNAi loss. *G3*  
801 (*Bethesda*) 11.

802 Hagen F, Khayhan K, Theelen B, Kolecka A, Polacheck I, Sionov E, Falk R, Parnmen S, Lumbsch HT, et  
803 al. 2015. Recognition of seven species in the *Cryptococcus gattii*/*Cryptococcus neoformans* species  
804 complex. *Fungal Genet Biol* 78: 16-48.

805 Hai TP, Tuan TL, Van Anh D, Mai TN, Phu Huong LN, Thwaites GE, Johnson E, Van Vinh Chau N, Ashton  
806 P, et al. 2020. The expression of virulence by the *Cryptococcus neoformans* VN1a-5 lineage is plastic  
807 and associated with host immune background. *bioRxiv*: 2020.2002.2024.962134.

808 Hester MM, Lee CK, Abraham A, Khoshkenar P, Ostroff GR, Levitz SM, Specht CA 2020. Protection of  
809 mice against experimental cryptococcosis using glucan particle-based vaccines containing novel  
810 recombinant antigens. *Vaccine* 38: 620-626.

811 Hill E, Solomon P (2020). Extracellular Vesicles from the Apoplastical Fungal Wheat Pathogen  
812 *Zymoseptoria tritici*, Research Square.

813 Hole CR, Wager CML, Castro-Lopez N, Campuzano A, Cai H, Wozniak KL, Wang Y, Wormley FL 2019.  
814 Induction of memory-like dendritic cell responses in vivo. *Nature Com* 10: 2955.



- 815 Huang C, Nong SH, Mansour MK, Specht CA, Levitz SM 2002. Purification and characterization of a  
816 second immunoreactive mannoprotein from *Cryptococcus neoformans* that stimulates T-cell  
817 responses. *Infect Immun* 70: 5485-5493.
- 818 Janbon G, Ormerod KL, Paulet D, Byrnes III EJ, Chatterjee G, Yadav V, Mullapudi N, Hon CC, Billmyre  
819 RB, et al. 2014. Analysis of the genome and transcriptome of *Cryptococcus neoformans* var. *grubii*  
820 reveals complex RNA expression and microevolution leading to virulence attenuation. *PLoS Genet* 10:  
821 e1004261.
- 822 Janbon G, Quintin J, Lanternier F, d'Enfert C 2019. Studying fungal pathogens of humans and fungal  
823 infections: fungal diversity and diversity of approaches. *Genes Immun* 20: 403-414.
- 824 Joffe LS, Nimrichter L, Rodrigues ML, Del Poeta M 2016. Potential Roles of Fungal Extracellular  
825 Vesicles during Infection. *mSphere* 1: e00099-00016.
- 826 Johansson HJ, Vallhov H, Holm T, Gehrman U, Andersson A, Johansson C, Blom H, Carroni M, Lehtiö  
827 J, et al. 2018. Extracellular nanovesicles released from the commensal yeast *Malassezia sympodialis*  
828 are enriched in allergens and interact with cells in human skin. *Sci Rep* 8: 9182.
- 829 Jung WH, Sham A, Lian T, Singh A, Kosman DJ, Kronstad JW 2008. Iron source preference and  
830 regulation of iron uptake in *Cryptococcus neoformans*. *PLoS Pathog* 4: e45.
- 831 Karkowska-Kuleta J, Kulig K, Karnas E, Zuba-Surma E, Woznicka O, Pyza E, Kuleta P, Osyczka A, Rapala-  
832 Kozik M, et al. 2020. Characteristics of extracellular vesicles released by the pathogenic yeast-like  
833 fungi *Candida glabrata*, *Candida parapsilosis* and *Candida tropicalis*. *Cells* 9: 1722.
- 834 Kremer JR, Mastronarde DN, McIntosh JR 1996. Computer Visualization of Three-Dimensional Image  
835 Data Using IMOD. *Journal of Structural Biology* 116: 71-76.
- 836 Krogh A, Larsson B, von Heijne G, Sonnhammer ELL 2001. Predicting transmembrane protein  
837 topology with a hidden markov model: application to complete genomes. *J Mol Biol* 305: 567-580.
- 838 Kwon-Chung KJ, Fraser JA, Doering TL, Wang Z, Janbon G, Idnurm A, Bahn YS 2014. *Cryptococcus*  
839 *neoformans* and *Cryptococcus gattii*, the etiologic agents of cryptococcosis. *Cold Spring Harb Perspect*  
840 *Med* 4: a019760.
- 841 Lee DJ, Bahn YS, Kim HJ, Chung SY, Kang HA 2015. Unraveling the novel structure and biosynthetic  
842 pathway of O-linked glycans in the Golgi apparatus of the human pathogenic yeast *Cryptococcus*  
843 *neoformans*. *J Biol Chem* 290: 1861-1873.
- 844 Leone F, Bellani L, Muccifora S, Giorgetti L, Bongioanni P, Simili M, Maserti B, Del Carratore R 2018.  
845 Analysis of extracellular vesicles produced in the biofilm by the dimorphic yeast *Pichia fermentans*.  
846 *Journal of Cellular Physiology* 233: 2759-2767.
- 847 Levitz SM, Nong S, Mansour MK, Huang C, Specht CA 2001. Molecular characterization of a  
848 mannoprotein with homology to chitin deacetylases that stimulates T cell responses to *Cryptococcus*  
849 *neoformans*. *Proc Natl Acad Sci USA* 98: 10422-10427.
- 850 Maas SLN, de Vrij J, van der Vlist EJ, Geragousian B, van Bloois L, Mastrobattista E, Schiffelers RM,  
851 Wauben MHM, Broekman MLD, et al. 2015. Possibilities and limitations of current technologies for  
852 quantification of biological extracellular vesicles and synthetic mimics. *Journal of Controlled Release*  
853 200: 87-96.
- 854 Macedo-da-Silva J, Santiago VF, Rosa-Fernandes L, Marinho CRF, Palmisano G 2021. Protein  
855 glycosylation in extracellular vesicles: Structural characterization and biological functions. *Mol*  
856 *Immunol* 135: 226-246.
- 857 Masso-Silva J, Espinosa V, Liu T-B, Wang Y, Xue C, Rivera A 2018. The F-Box protein Fbp1 shapes the  
858 immunogenic potential of *Cryptococcus neoformans*. *mBio* 9: e01828-01817.
- 859 Mastronarde DN 2005. Automated electron microscope tomography using robust prediction of  
860 specimen movements. *Journal of Structural Biology* 152: 36-51.
- 861 Mastronarde DN, Held SR 2017. Automated tilt series alignment and tomographic reconstruction in  
862 IMOD. *Journal of structural biology* 197: 102-113.
- 863 Meldolesi J 2018. Exosomes and Ectosomes in Intercellular Communication. *Curr Biol* 28: R435-R444.
- 864 Moyrand F, Fontaine T, Janbon G 2007. Systematic capsule gene disruption reveals the central role of  
865 galactose metabolism on *Cryptococcus neoformans* virulence. *Mol Microbiol* 64: 771-781.

- 866 Mulder WJM, Ochando J, Joosten LAB, Fayad ZA, Netea MG 2019. Therapeutic targeting of trained  
867 immunity. *Nat Rev Drug Discov* 18: 553-566.
- 868 Muszewska A, Piśyk S, Perlińska-Lenart U, Kruszewska JS 2017. Diversity of Cell Wall Related Proteins  
869 in Human Pathogenic Fungi. *Journal of fungi (Basel, Switzerland)* 4: 6.
- 870 Nami S, Mohammadi R, Vakili M, Khezripour K, Mirzaei H, Morovati H 2019. Fungal vaccines,  
871 mechanism of actions and immunology: A comprehensive review. *Biomedicine & Pharmacotherapy*  
872 109: 333-344.
- 873 Neuman BW, Adair BD, Yoshioka C, Quispe JD, Orca G, Kuhn P, Milligan RA, Yeager M, Buchmeier MJ  
874 2006. Supramolecular architecture of severe acute respiratory syndrome coronavirus revealed by  
875 electron cryomicroscopy. *J Virol* 80: 7918-7928.
- 876 Noble JM, Roberts LM, Vidavsky N, Chiou AE, Fischbach C, Paszek MJ, Estroff LA, Kourkoutis LF 2020.  
877 Direct comparison of optical and electron microscopy methods for structural characterization of  
878 extracellular vesicles. *Journal of Structural Biology* 210: 107474.
- 879 O'Meara TR, Alspaugh JA 2012. The *Cryptococcus neoformans* capsule: a sword and a shield. *Clin*  
880 *Microbiol Rev* 25: 387-408.
- 881 Oliveira DL, Freire-de-Lima CG, Nosanchuk JD, Casadevall A, Rodrigues ML, Nimrichter L 2010.  
882 Extracellular vesicles from *Cryptococcus neoformans* modulate macrophage functions. *Infect Immun*  
883 78: 1601-1609.
- 884 Oliveira DL, Nakayasu ES, Joffe LS, Guimarães AJ, Sobreira TJP, Nosanchuk JD, Cordero RJB, Frases S,  
885 Casadevall A, et al. 2010. Characterization of Yeast Extracellular Vesicles: Evidence for the  
886 Participation of Different Pathways of Cellular Traffic in Vesicle Biogenesis. *PLOS ONE* 5: e11113.
- 887 Oliveira DL, Nimrichter L, Miranda K, Frases S, Faull KF, Casadevall A, Rodrigues ML 2009.  
888 *Cryptococcus neoformans* cryoultramicrotomy and vesicle fractionation reveals an intimate  
889 association between membrane lipids and glucuronoxylomannan. *Fungal Genet Biol* 46: 956-963.
- 890 Oliveira DL, Rizzo J, Joffe LS, Godinho RMC, Rodrigues ML 2013. Where do they come from and  
891 where do they go: candidates for regulating extracellular vesicle formation in fungi. *Int J Mol Sci* 14:  
892 9581-9603.
- 893 Orlov I, Myasnikov AG, Andronov L, Natchiar SK, Khatter H, Beinsteiner B, Ménétret J-F, Hazemann I,  
894 Mohideen K, et al. 2017. The integrative role of cryo electron microscopy in molecular and cellular  
895 structural biology. *Biology of the Cell* 109: 81-93.
- 896 Pettersen EF, Goddard TD, Huang CC, Couch GS, Greenblatt DM, Meng EC, Ferrin TE 2004. UCSF  
897 Chimera—A visualization system for exploratory research and analysis. *Journal of Computational*  
898 *Chemistry* 25: 1605-1612.
- 899 Pierleoni A, Martelli PL, Casadio R 2008. PredGPI: a GPI-anchor predictor. *BMC Bioinformatics* 9: 392.
- 900 Plaine A, Walker L, Da Costa G, Mora-Montes HM, McKinnon A, Gow NAR, Gaillardin C, Munro CA,  
901 Richard ML 2008. Functional analysis of *Candida albicans* GPI-anchored proteins: roles in cell wall  
902 integrity and caspofungin sensitivity. *Fungal genetics and biology : FG & B* 45: 1404-1414.
- 903 Rajasingham R, Smith RM, Park BJ, Jarvis JN, Govender NP, Chiller TM, Denning DW, Loyse A,  
904 Boulware DR 2017. Global burden of disease of HIV-associated cryptococcal meningitis: an updated  
905 analysis. *The Lancet Infectious Diseases* 17: 873-881.
- 906 Rayner S, Bruhn S, Vallhov H, Andersson A, Billmyre RB, Scheynius A 2017. Identification of small  
907 RNAs in extracellular vesicles from the commensal yeast *Malassezia sympodialis*. *Sci Rep* 7: 39742.
- 908 Reis FCG, Borges BS, Jozefowicz LJ, Sena BAG, Garcia AWA, Medeiros LC, Martins ST, Honorato L,  
909 Schrank A, et al. 2019. A Novel Protocol for the Isolation of Fungal Extracellular Vesicles Reveals the  
910 Participation of a Putative Scramblase in Polysaccharide Export and Capsule Construction in  
911 *Cryptococcus gattii*. *mSphere* 4: e00080-00019.
- 912 Reis FCG, Costa JH, Honorato L, Nimrichter L, Fill TP, Rodrigues ML 2021. Small Molecule Analysis of  
913 Extracellular Vesicles Produced by *Cryptococcus gattii*: Identification of a Tripeptide Controlling  
914 Cryptococcal Infection in an Invertebrate Host Model. *Front Immunol* 12.
- 915 Richie DL, Hartl L, Amanianda V, Winters MS, Fuller KK, Miley MD, White S, McCarthy JW, Latgé J-P,  
916 et al. 2009. A role for the unfolded protein response (UPR) in virulence and antifungal susceptibility  
917 in *Aspergillus fumigatus*. *PLoS Pathog* 5: e1000258-e1000258.

- 918 Rizzo J, Albuquerque PC, Wolf JM, Nascimento R, Pereira MD, Nosanchuk JD, Rodrigues ML 2017.  
919 Analysis of multiple components involved in the interaction between *Cryptococcus neoformans* and  
920 *Acanthamoeba castellanii*. *Fungal Biology* 121: 602-614.
- 921 Rizzo J, Chaze T, Miranda K, Roberson RW, Gorgette O, Nimrichter L, Matondo M, Latgé J-P, Beauvais  
922 A, et al. 2020. Characterization of extracellular vesicles produced by *Aspergillus fumigatus*  
923 protoplasts. *mSphere* 5: e00476-00420.
- 924 Rizzo J, Rodrigues ML, Janbon G 2020. Extracellular Vesicles in Fungi: Past, Present, and Future  
925 Perspectives. *Front Cell Infect Microbiol* 10.
- 926 Robbins PD, Morelli AE 2014. Regulation of immune responses by extracellular vesicles. *Nat Rev*  
927 *Immunol* 14: 195-208.
- 928 Rodrigues ML, Casadevall A 2018. A two-way road: novel roles for fungal extracellular vesicles. *Mol*  
929 *Microbiol* 110: 11-15.
- 930 Rodrigues ML, Godinho RMC, Zamith-Miranda D, Nimrichter L 2015. Traveling into Outer Space:  
931 Unanswered Questions about Fungal Extracellular Vesicles. *PLoS Pathog* 11: e1005240.
- 932 Rodrigues ML, Nakayasu ES, Oliveira DL, Nimrichter L, Nosanchuk JD, Almeida IC, A. C 2008.  
933 Extracellular vesicles produced by *Cryptococcus neoformans* contain protein components associated  
934 with virulence. *Eukaryot Cell* 7: 58-67.
- 935 Rodrigues ML, Nimrichter L, Oliveira DL, Frases S, Miranda K, Zaragoza O, Alvarez M, Nakouzi A,  
936 Feldmesser M, et al. 2007. Vesicular polysaccharide export in *Cryptococcus neoformans* is a  
937 eukaryotic solution to the problem of fungal trans-cell wall transport. *Eukaryot Cell* 6: 48-59.
- 938 Roth R, Hillmer S, Funaya C, Chiapello M, Schumacher K, Lo Presti L, Kahmann R, Paszkowski U 2019.  
939 Arbuscular cell invasion coincides with extracellular vesicles and membrane tubules. *Nature Plants* 5:  
940 204-211.
- 941 Schorb M, Haberbosch I, Hagen WJH, Schwab Y, Mastrorade DN 2019. Software tools for automated  
942 transmission electron microscopy. *Nature Meth* 16: 471-477.
- 943 Schwanhäusser B, Busse D, Li N, Dittmar G, Schuchhardt J, Wolf J, Chen W, Selbach M 2011. Global  
944 quantification of mammalian gene expression control. *Nature* 473: 337-342.
- 945 Shopova IA, Belyaev I, Dasari P, Jahreis S, Stroe MC, Cseresnyés Z, Zimmermann A-K, Medyukhina A,  
946 Svensson C-M, et al. 2020. Human Neutrophils Produce Antifungal Extracellular Vesicles against  
947 *Aspergillus fumigatus*. *mBio* 11: e00596-00520.
- 948 Souza JAM, Baltazar LdM, Carregal VM, Gouveia-Eufrazio L, de Oliveira AG, Dias WG, Campos Rocha  
949 M, Rocha de Miranda K, Malavazi I, et al. 2019. Characterization of *Aspergillus fumigatus*  
950 extracellular vesicles and their effects on macrophages and neutrophils functions. *Front Microbiol* 10:  
951 2008-2008.
- 952 Specht CA, Lee CK, Huang H, Hester MM, Liu J, Luckie BA, Torres Santana MA, Mirza Z, Khoshkenar P,  
953 et al. 2017. Vaccination with Recombinant *Cryptococcus* Proteins in Glucan Particles Protects Mice  
954 against *Cryptococcosis* in a Manner Dependent upon Mouse Strain and *Cryptococcal* Species. *mBio* 8:  
955 e01872-01817.
- 956 Tefsen B, Grijpstra J, Ordonez S, Lammers M, van Die I, de Cock H 2014. Deletion of the CAP10 gene  
957 of *Cryptococcus neoformans* results in a pleiotropic phenotype with changes in expression of  
958 virulence factors. *Research in Microbiology* 165: 399-410.
- 959 Thak EJ, Lee S-B, Xu-Vanpala S, Lee D-J, Chung S-Y, Bahn Y-S, Oh D-B, Shinohara ML, Kang HA 2020.  
960 Core N-glycan structures are critical for the pathogenicity of *Cryptococcus neoformans* by modulating  
961 host cell death. *mBio* 11: e00711-00720.
- 962 Theelen B, Cafarchia C, Gaitanis G, Bassukas ID, Boekhout T, Dawson TL, Jr. 2018. *Malassezia* ecology,  
963 pathophysiology, and treatment. *Med Mycol* 56: S10-S25.
- 964 Théry C, Witwer KW, Aikawa E, Alcaraz MJ, Anderson JD, Andriantsitohaina R, Antoniou A, Arab T,  
965 Archer F, et al. 2018. Minimal information for studies of extracellular vesicles 2018 (MISEV2018): a  
966 position statement of the International Society for Extracellular Vesicles and update of the  
967 MISEV2014 guidelines. *J Extracell Vesicles* 7: 1535750-1535750.
- 968 Tyanova S, Temu T, Cox J 2016. The MaxQuant computational platform for mass spectrometry-based  
969 shotgun proteomics. *Nature Protocols* 11: 2301-2319.

- 970 Ueno K, Yanagihara N, Shimizu K, Miyazaki Y 2020. Vaccines and protective immune memory  
971 against Cryptococcosis. *Biol. Pharm. Bull.* 43.
- 972 Vallejo MC, Nakayasu ES, Longo LVG, Ganiko L, Lopes FG, Matsuo AL, Almeida IC, Puccia R 2012.  
973 Lipidomic analysis of extracellular vesicles from the pathogenic phase of *Paracoccidioides brasiliensis*.  
974 *PLoS one* 7: e39463-e39463.
- 975 Van Der Pol E, Hoekstra AG, Sturk A, Otto C, Van Leeuwen TG, Nieuwland R 2010. Optical and non-  
976 optical methods for detection and characterization of microparticles and exosomes. *Journal of*  
977 *Thrombosis and Haemostasis* 8: 2596-2607.
- 978 van Niel G, D'Angelo G, Raposo G 2018. Shedding light on the cell biology of extracellular vesicles.  
979 *Nature Reviews Molecular Cell Biology* 19: 213-228.
- 980 Vargas G, Honorato L, Guimarães AJ, Rodrigues ML, Reis FCG, Vale AM, Ray A, Nosanchuk JD,  
981 Nimrichter L 2020. Protective effect of fungal extracellular vesicles against murine candidiasis. *Cell*  
982 *Microbiol n/a*: e13238.
- 983 Vargas G, Rocha JDB, Oliveira DL, Albuquerque PC, Frases S, Santos SS, Nosanchuk JD, Gomes AMO,  
984 Medeiros LCAS, et al. 2015. Compositional and immunobiological analyses of extracellular vesicles  
985 released by *Candida albicans*. *Cell Microbiol* 17: 389-407.
- 986 Wallace EWJ, Maufrais C, Sales-Lee J, Tuck LR, de Oliveira L, Feuerbach F, Moyrand F, Natarajan P,  
987 Madhani HD, et al. 2020. Quantitative global studies reveal differential translational control by start  
988 codon context across the fungal kingdom. *Nucleic Acids Res* 48: 2312-2331.
- 989 Wang X, Thompson CD, Weidenmaier C, Lee JC 2018. Release of *Staphylococcus aureus* extracellular  
990 vesicles and their application as a vaccine platform. *Nature Com* 9: 1379-1379.
- 991 Witwer KW, Théry C 2019. Extracellular vesicles or exosomes? On primacy, precision, and popularity  
992 influencing a choice of nomenclature. *J Extracell Vesicles* 8: 1648167.
- 993 Wolf JM, Espadas-Moreno J, Luque-Garcia JL, Casadevall A 2014. Interaction of *Cryptococcus*  
994 *neoformans* extracellular vesicles with the cell wall. *Eukaryot Cell* 13: 1484-1493.
- 995 Wolf JM, Espadas J, Luque-Garcia J, Reynolds T, Casadevall A 2015. Lipid biosynthetic genes affect  
996 *Candida albicans* extracellular vesicle morphology, cargo, and immunostimulatory properties.  
997 *Eukaryot Cell* 14: 745-754.
- 998 Xu R, Rai A, Chen M, Suwakulsiri W, Greening DW, Simpson RJ 2018. Extracellular vesicles in cancer  
999 — implications for future improvements in cancer care. *Nature Reviews Clinical Oncology* 15: 617-  
1000 638.
- 1001 Yang B, Wang J, Jiang H, Lin H, Ou Z, Ullah A, Hua Y, Chen J, Lin X, et al. 2021. Extracellular vesicles  
1002 derived from *Talaromyces marneffe* yeasts mediate inflammatory response in macrophage cells by  
1003 bioactive protein components. *Front Microbiol* 11.
- 1004 Yang JE, Rossignol ED, Chang D, Zaia J, Forrester I, Raja K, Winbigler H, Nicastro D, Jackson WT, et al.  
1005 2020. Complexity and ultrastructure of infectious extracellular vesicles from cells infected by non-  
1006 enveloped virus. *Sci Rep* 10: 7939.
- 1007 Zabeo D, Cvjetkovic A, Lässer C, Schorb M, Lötval J, Höög JL 2017. Exosomes purified from a single  
1008 cell type have diverse morphology. *J Extracell Vesicles* 6: 1329476-1329476.
- 1009 Zanetti G, Briggs JAG, Grünwald K, Sattentau QJ, Fuller SD 2006. Cryo-Electron Tomographic  
1010 Structure of an Immunodeficiency Virus Envelope Complex In Situ. *PLoS Pathog* 2: e83.
- 1011 Zarnowski R, Sanchez H, Covelli AS, Dominguez E, Jaromin A, Bernhardt J, Mitchell KF, Heiss C, Azadi  
1012 P, et al. 2018. *Candida albicans* biofilm-induced vesicles confer drug resistance through matrix  
1013 biogenesis. *PLoS Biol* 16: e2006872.
- 1014 Zhao K, Bleackley M, Chisanga D, Gangoda L, Fonseka P, Liem M, Kalra H, Al Saffar H, Keerthikumar S,  
1015 et al. 2019. Extracellular vesicles secreted by *Saccharomyces cerevisiae* are involved in cell wall  
1016 remodelling. *Communications Biology* 2: 305.

1017

1018

1019 **Geolocalisation**

|      |                         |       |                     |
|------|-------------------------|-------|---------------------|
| 1020 | Juliana RIZZO           | ORCID | 0000-0001-5538-6471 |
| 1021 | Sarah Sze Wah WONG      | ORCID | 0000-0002-9440-1774 |
| 1022 | Anastasia D. GAZI       | ORCID | 0000-0002-2922-3625 |
| 1023 | Thibault CHAZE          | ORCID | 0000-0002-3615-7021 |
| 1024 | Pierre-Henri COMMERE    | ORCID | 0000-0002-3886-4256 |
| 1025 | Sophie NOVAULT          | ORCID | 0000-0001-5708-3597 |
| 1026 | Mariette MATONDO        | ORCID | 0000-0003-3958-7710 |
| 1027 | Gerard PEHAUD-ARNAUDET  | ORCID | 0000-0001-6479-9470 |
| 1028 | Lysangela R ALVES       | ORCID | 0000-0002-1972-2658 |
| 1029 | Robin C. MAY            | ORCID | 0000-0001-5364-1838 |
| 1030 | Leonardo NIMRICHTER     | ORCID | 0000-0001-9281-6856 |
| 1031 | Marcio L. RODRIGUES :   | ORCID | 0000-0002-6081-3439 |
| 1032 | Vishukumar AIMANIANDA : | ORCID | 0000-0001-5813-7497 |
| 1033 | Guilhem JANBON :        | ORCID | 0000-0002-4788-1154 |

1034

1035

1036

### 1037 **Acknowledgements**

1038

1039 This work was supported by a CAPES COFECUB grant n°39712ZK (to GJ, MLR, LA and  
1040 LN). JR was supported by the CAPES-COFECUB Franco-Brazilian Research Exchange  
1041 Program (88887.357947/2019-00) and by a Pasteur-Roux-Cantarini fellowship of Institut  
1042 Pasteur. SSWW was supported by CEFIPRA/ANR-DFG-AfuINF grant and Pasteur-Roux-  
1043 Cantarini postdoctoral fellowship. VA was supported by ANR-DFG AfuINF and Indo-French  
1044 Centre for the Promotion of Advanced Research (CEFIPRA; Grant N°5403-1) grants. Jean-  
1045 Marie Winter from the NanoImaging Core at Institut Pasteur is acknowledged for his support  
1046 image acquisition. The NanoImaging Core was created with the help of a grant from the  
1047 French Government's 'Investissements d'Avenir' program (EQUIPEX CACSICE – “Centre  
1048 d'analyse de systèmes complexes dans les environnements complexes”, ANR-11-EQPX-  
1049 0008). The Falcon II equipping the F20 microscope at the UBI used during this study was also  
1050 financed by the Equipex CACSICE (grant number ANR-11-EQPX-0008). M.L.R. is  
1051 supported by grants from the Brazilian Ministry of Health (grant 440015/2018-9), Conselho  
1052 Nacional de Desenvolvimento Científico e Tecnológico (CNPq; grants 405520/2018-2 and  
1053 301304/2017-3), and Fiocruz (grants VPPCB-007-FIO-18 and VPPIS-001-FIO18)MLR, JR,  
1054 and FCGR also acknowledge support from Coordenação de Aperfeiçoamento de Pessoal  
1055 de Nível Superior (CAPES, finance code 001) and the Instituto Nacional de Ciência e  
1056 Tecnologia de Inovação em Doenças de Populações Negligenciadas (INCT-IDPN).  
1057 MLR is currently on leave of an associate professor position at the Instituto de Microbiologia

1058 Paulo de Góes of the Universidade Federal do Rio de Janeiro. We thank Adèle Trottier for her  
1059 help in the preparation of EV samples.

1060

1061

1062 **Figures legends**

1063

1064 **Figure 1: Cryo-electron microscopy analysis of *C. neoformans* extracellular vesicles**  
1065 **(EVs).**

1066 Cryo-EM analysis revealed a heterogeneous population of vesicles with diverse structural  
1067 aspects, previously unappreciated in fungal EVs (A). As shown, the EVs were delimited by  
1068 a lipid bilayer (B to E), which showed either no decoration (in 10.8% vesicles, panels B and  
1069 C) or a fibrillar decoration (arrows) in 89.2% of the EVs analyzed (panels D and E). Three-  
1070 dimensional organization of the fibrillar decoration (yellow) on the membrane (purple) of  
1071 EVs as revealed by cryo-electron tomography analysis (F), magnified in panels G and H. Full  
1072 surface representation models as seen from top view (G). Same models clipped with clipping  
1073 plane oriented perpendicular to line of sight (H). Data presented in this figure have been  
1074 generated using images obtained using a Titan Krios (Thermo Scientific) transmission  
1075 electron microscope.

1076

1077 **Figure 2: Analysis of size and structural diversity of *C. neoformans* EVs.**

1078 NTA analysis of purified EVs revealed a size diameter ranging from 80 to 500 nm, with the  
1079 highest distribution around 150 nm (A). Frequency distribution of EV diameters determined  
1080 by CryoEM, a total of 434 regular EVs were analyzed. The analysis based on CryoEM  
1081 tomograms revealed a wider range of EV size distribution, from 10 to 500 nm diameter, with  
1082 the highest relative frequency below 100 nm (B). Cryo-EM images exemplifying EV size  
1083 range. Scale bars corresponding to 100 nm (C). EV size distribution according to the presence  
1084 or absence of surface decoration (D). Non-decorated EVs have a smaller diameter size  
1085 distribution compared to decorated ones (E). Analysis of decoration thickness from Cryo-EM  
1086 images from 105 single EVs (F). Analysis of a potential relationship between decoration  
1087 thickness and EV diameter by linear regression (G). Data presented in this figure have been  
1088 generated using images obtained using a Titan Krios (Thermo Scientific) transmission  
1089 electron microscope. Error bars show means  $\pm$  SD. Sample size (n) is indicated and, in  
1090 brackets, the number of vesicles in that category that exceeded 500 nm in size.

1091

1092 **Figure 3: Comparative analysis of size and structural diversity of EVs in *C. neoformans*,**  
1093 ***C. deneoformans* and *C. deuterogattii*.**

1094 Analysis of EV diameters revealed a smaller size distribution in *C. deuterogattii* strain R265  
1095 and *C. deneoformans* strain JEC21 than in *C. neoformans* KN99 $\alpha$ . The total numbers of

1096 vesicles analyzed were *C. neoformans* (n=143 for size and n=112 for decoration), *C.*  
1097 *deneoformans* (n= 90 for size and n=63 for decoration), *C. deuterogattii* (n= 115 for size and  
1098 n=95 for decoration) (A). Analysis of the decoration thickness revealed a smaller distribution  
1099 for *C. deneoformans* and *C. deuterogattii* compared with *C. neoformans* (B). Illustrative  
1100 images of size and decoration of EVs obtained from the three species. The data presented in  
1101 this figure have been generated using images obtained using a TECNAI F20 transmission  
1102 electron microscope (C). Error bars show means  $\pm$  SD. Scale bars represent 100 nm.

1103

1104

1105 **Figure 4: Flow cytometry analysis of *C. neoformans* EVs incubated with monoclonal**  
1106 **anti-GXM antibody.**

1107 FACS analysis of wild type (WT) and the acapsular *cap59Δ* EVs in PBS or in the presence of  
1108 the monoclonal antibody raised against the capsular polysaccharide 18b7 (+ mAb anti-GXM)  
1109 (A). The analysis revealed strong labelling of WT vesicles (74.7%), compared to the weak  
1110 labelling in the mutant (2.33%), (B). Despite the important labelling difference, *C.*  
1111 *neoformans* WT and *cap59Δ* strains released EVs bearing similar surface decoration, shown  
1112 by the cryo-EM (arrows), as well as EVs obtained from other fungal species such as *C.*  
1113 *albicans* and *S. cerevisiae* (C). These cryo-EM data have been generated using a TECNAI  
1114 F20 transmission electron microscope. Scale bar represents 100 nm. This experiment was  
1115 repeated twice with similar results.

1116

1117 **Figure 5: Analysis of *Cryptococcus spp* protein cargo.**

1118 Venn diagram revealing shared and unique EV-associated proteins in *C. neoformans*, *C.*  
1119 *deneoformans*, and *C. deuterogattii*. Seventeen proteins were identified to be associated with  
1120 EVs in all three *Cryptococcus* species (A). List of the gene loci and the corresponding  
1121 proteins commonly found in EVs released by the three species, which could be considered as  
1122 putative cryptococcal EV-protein markers (B). Most of the proteins are predicted to be either  
1123 GPI-anchored proteins, to contain a signal peptide or to possess other membrane domains,  
1124 according to preGPI, signalP and TMHMM website, respectively. Six protein families  
1125 appeared to be typical of *Cryptococcus* EVs, including the Chitin deacetylase family (Cda),  
1126 the Ricin-type beta-trefoil lectin domain-containing protein family (Ril), the putative glyoxal  
1127 oxidase family (Gox), the tetraspanin membrane proteins containing a SUR7/PaII family  
1128 motif (Tsh), the pr4/barwin domain protein family (Blp), and the multicopper oxidase (Cfo).  
1129 Among these families, the proteins present in all three species are shown in green, proteins



1130 present in two species in orange and proteins present in only one species in yellow (C). We  
1131 also identify 21 putative GPI-anchored proteins, as predicted by PredGPI, and 10 of them  
1132 were present in all three species (D).

1133

1134 **Figure 6. Flow cytometry analysis of *C. neoformans* EVs incubated with GFP-labelled**  
1135 **ConA.**

1136 FACS analysis of EVs obtained from *C. neoformans* wild type and *cap59Δ* cells. EVs were  
1137 incubated with ConA-Alexa Fluor 488 conjugated lectin. After ultracentrifuge washing, the  
1138 EV pellets were mixed in BD Trucount tubes (BD Biosciences), containing a known number  
1139 of fluorescent beads as internal control. The number of events for each reading was fixed to  
1140 100,000 events and the percentage and intensity of ConA labeling were recorded. This  
1141 experiment was repeated three times with similar results.

1142

1143 **Figure 7. EV proteinase K treatment reduces ConA binding.**

1144 FACS analysis of EVs obtained from *C. neoformans* WT and *cap59Δ* cells after proteinase K  
1145 treatment. Proteinase K-treated EVs were submitted to ConA labelling, ultracentrifuge  
1146 washed and analyzed by flow cytometry. EV pellets were mixed in BD Trucount tubes (BD  
1147 Biosciences), containing a known number of fluorescent beads as an internal control. The  
1148 number of events for each reading was fixed to 100,000 events and the percentage and  
1149 intensity of ConA labeling were recorded. EVs treated using the same protocol but omitting  
1150 the enzyme were used as controls.

1151

1152 **Figure 8. Analysis of *C. neoformans* mutant strain EVs.**

1153 Evaluation of EV production by the different mutant strains as estimated by the measure of  
1154 the sterol concentration using the Amplex™ Red Cholesterol Assay Kit (A). Impact of the  
1155 different mutations on the percentage of ConA-labelled EVs as estimated through flow  
1156 cytometry (B). Analysis of EV size diameter in the *mp88Δ* and *alg3Δ* mutant strains as  
1157 compared to the wild type (WT). The total number of vesicles analyzed were WT (n = 143 for  
1158 size and n = 112 for decoration), *mp88Δ* (n = 107 for size and n = 86 for decoration), *alg3Δ* (n  
1159 = 119 for size and n = 92 for decoration) (C). Analysis of the decoration thickness revealed a  
1160 smaller distribution associated with *ALG3* or *MP88* deletions, as exemplified by illustrative  
1161 images from the three strains (D). The cryo-EM images were obtained using a TECNAI F20  
1162 transmission electron microscope. ConA labelling and sterol measurements were done for at

1163 least three independent biological replicates Error bars are represented as means  $\pm$  SD. Scale  
1164 bars represent 100 nm in C and 20 nm in D. (E)

1165

1166 **Figure 9: Model of simplified molecular structure and composition of *Cryptococcus* EVs.**

1167 In accordance with previous reports and in the light of our data, a new model of *Cryptococcus*  
1168 EVs is suggested, where the outer layer is composed of the capsular polysaccharide  
1169 glucuronoxylomannan (GXM), and the lipid bilayer is covered by many proteins, including  
1170 mannoproteins, making the visible fibrillar structure resolved by cryo-EM. Most of the  
1171 proteins are predicted to be GPI-anchored, to contain a signal peptide or to possess other  
1172 membrane domains, according to preGPI, signalP and TMHMM, respectively. Three proteins,  
1173 the hypothetical protein Cpc1, the putative V-type ATPase (Vma10) and the Vep3 are  
1174 predicted to be soluble. It is still unclear if these proteins are indeed inside the vesicular lumen  
1175 or linked to another transmembrane protein. For simplification, the lipid content was not  
1176 explored, but previous works shown the presence of sterol, phospholipoids and sphingolipids.  
1177 Additionally, *Cryptococcus* EVs were also described to contain other cargoes, such as RNA,  
1178 pigments, small molecules, and polysaccharides, including GXM, as detailed in plain text.

1179

1180 **Figure 10. Vaccination assays using *C. neoformans* EVs.**

1181 Female 6-weeks old BALB/c mice were immunized with *C. neoformans* EVs via  
1182 intraperitoneal injection, followed by intranasal infection with  $1 \times 10^4$  yeasts of wild-type  
1183 (WT) *C. neoformans*, and the mouse survival was monitored. In the first pilot experiment,  
1184 mice (n = 4 per group) were immunized with EVs from wild type or *cap59Δ* strain (1 and 10  
1185  $\mu\text{g}$  in 100  $\mu\text{L}$  of PBS) and control mice were injected with 100  $\mu\text{L}$  PBS. Western Blot using  
1186 mouse sera against fungal EV confirmed that all immunized mice produced antibodies against  
1187 EV proteins (A). All EV-immunized mice survived longer than the non-immunized ones, but  
1188 the immunization with *cap59Δ* EVs rendered a significantly prolonged mouse survival (\* $p$  =  
1189 0.01) (B). For the second set of experiment, mice (n = 10 per group) were immunized with  
1190 EVs from *cap59Δ* mutant strain (10  $\mu\text{g}$ /100  $\mu\text{L}$  in PBS) and control mice were injected with  
1191 100  $\mu\text{L}$  PBS. Again, Western blot using mouse sera against fungal EVs confirmed that all  
1192 immunized mice produced antibodies against EV proteins(C). EV-immunized mice showed  
1193 significantly prolonged survival (\* $p$  = 0.0006) compared to the non-immunized group (D).  
1194 Comparison of the survival curves was made by GraphPad Prism 8, using the Log-rank  
1195 (Mantel-Cox) test.

1196

1197

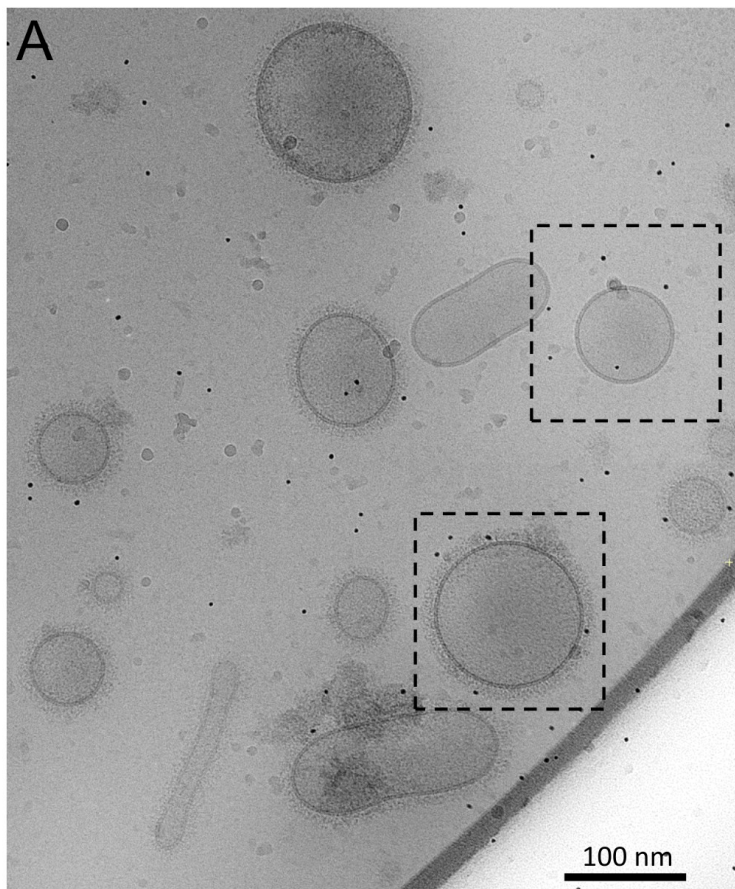

Non-decorated EVs: 10.8%

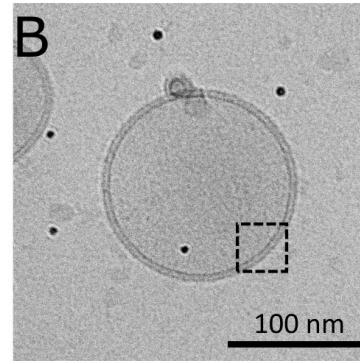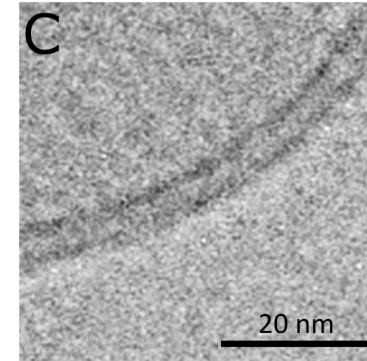

Decorated EVs: 89.2%

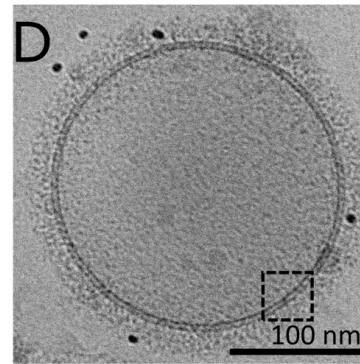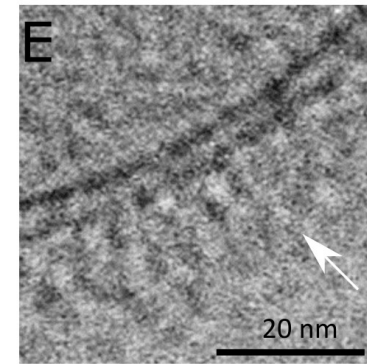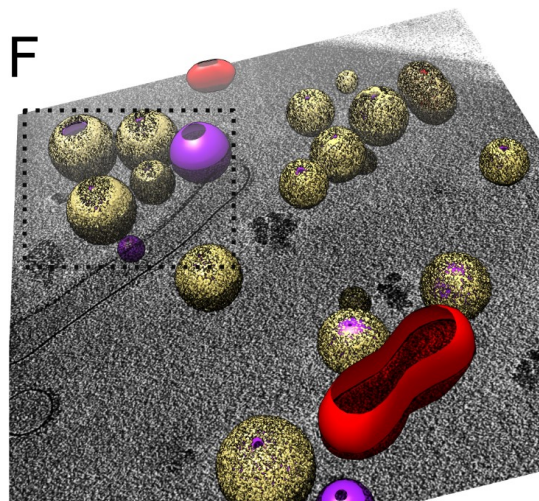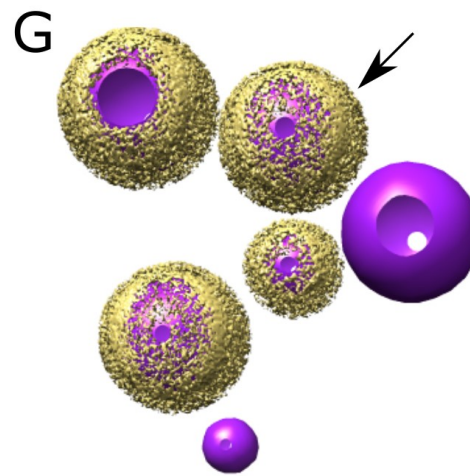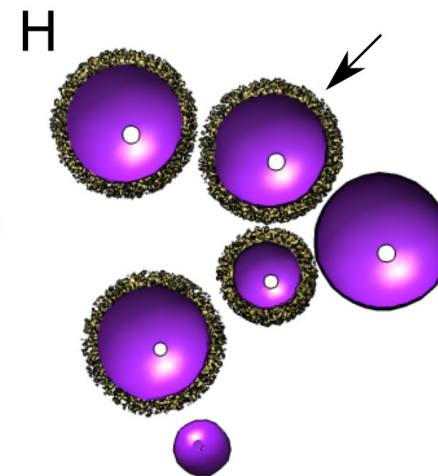

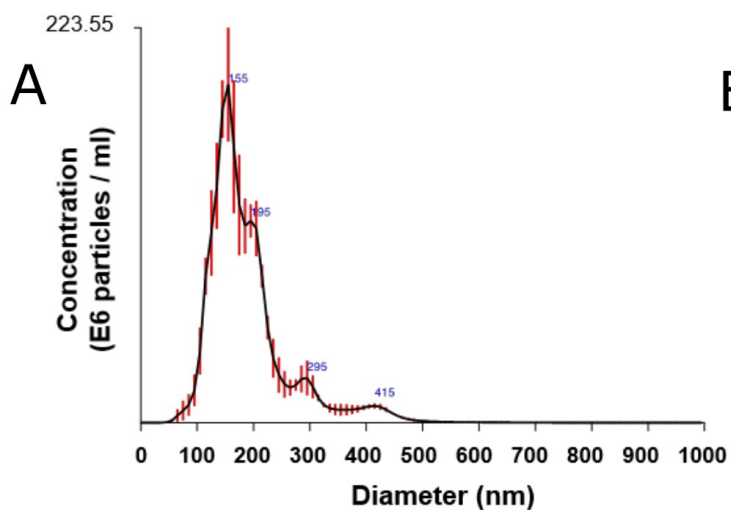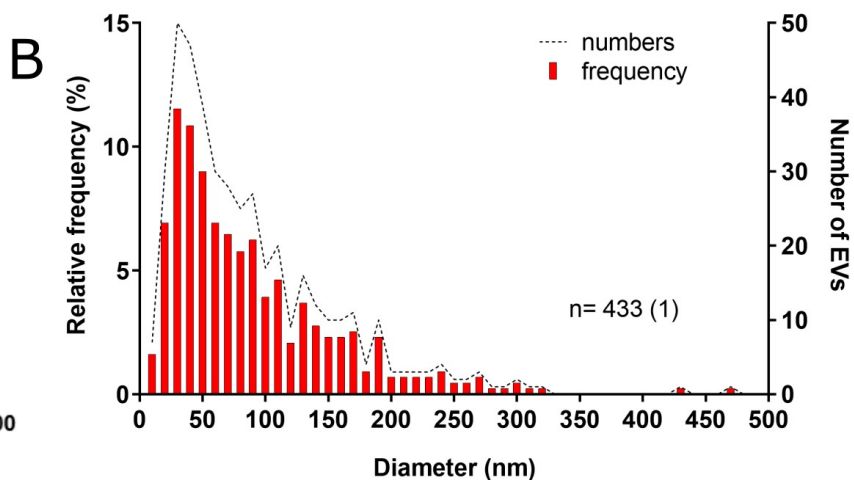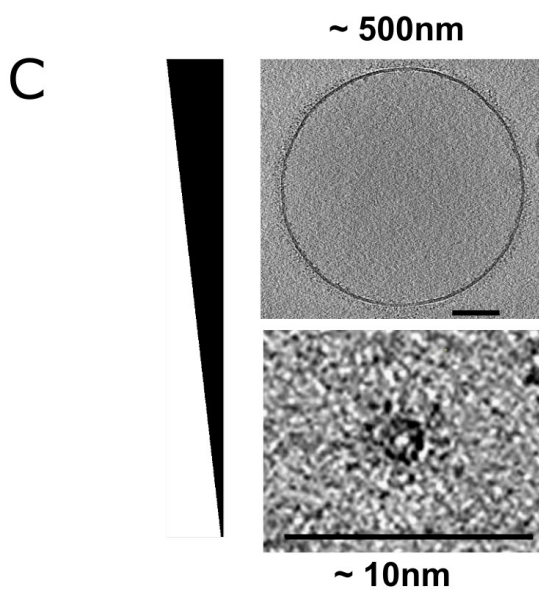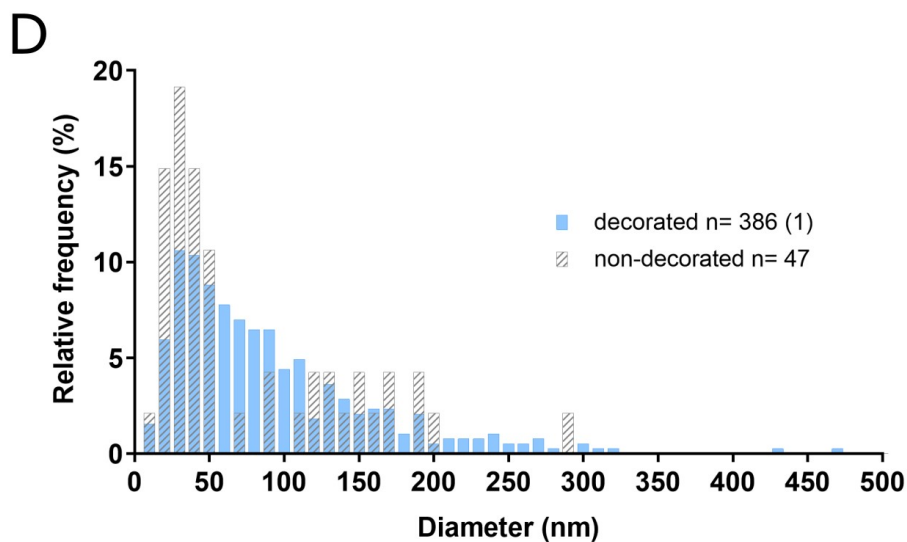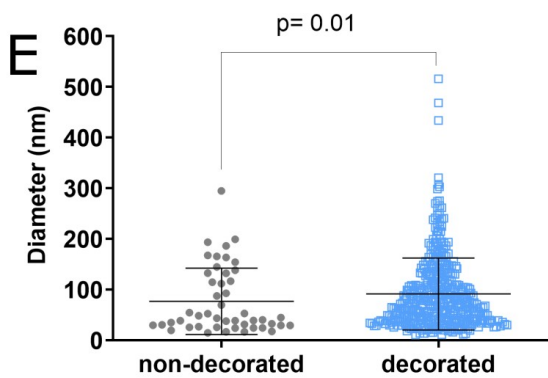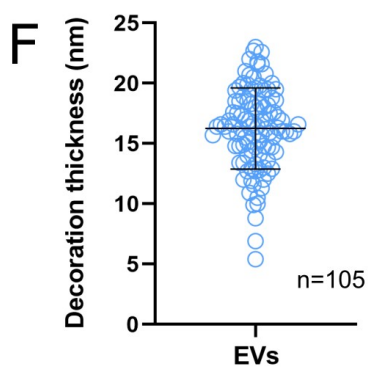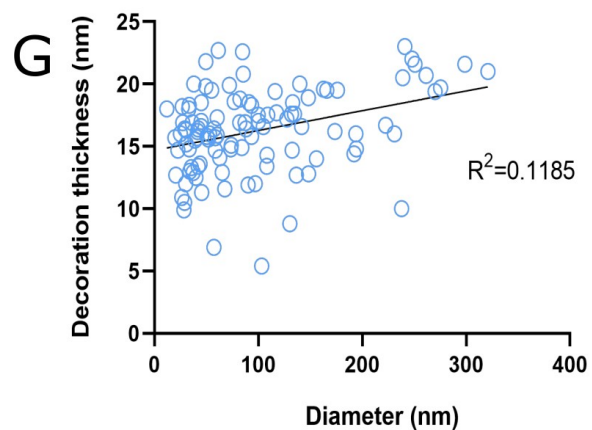

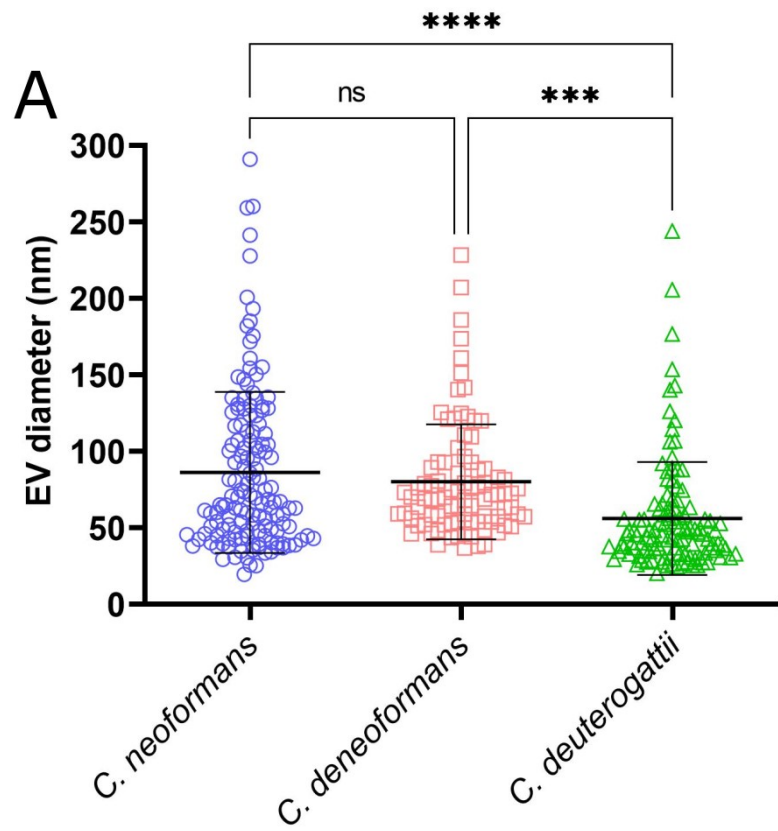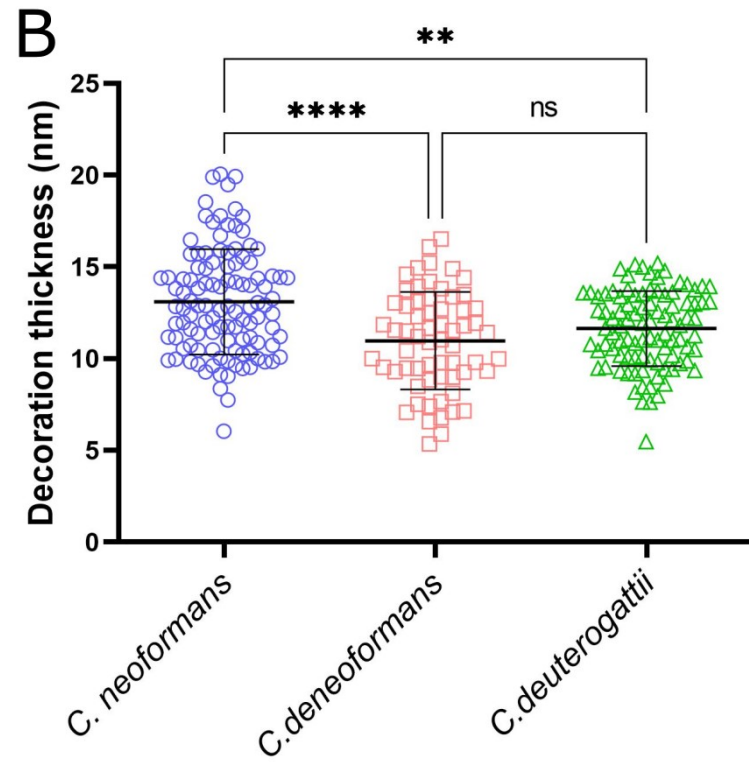

**C** *C. neoformans* *C. deneoformans* *C. deuterogattii*

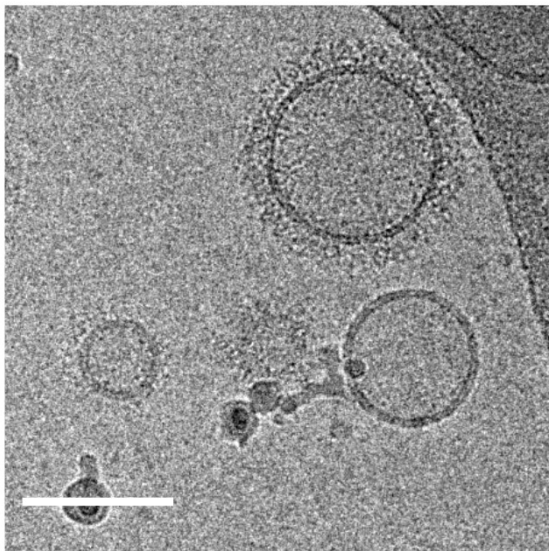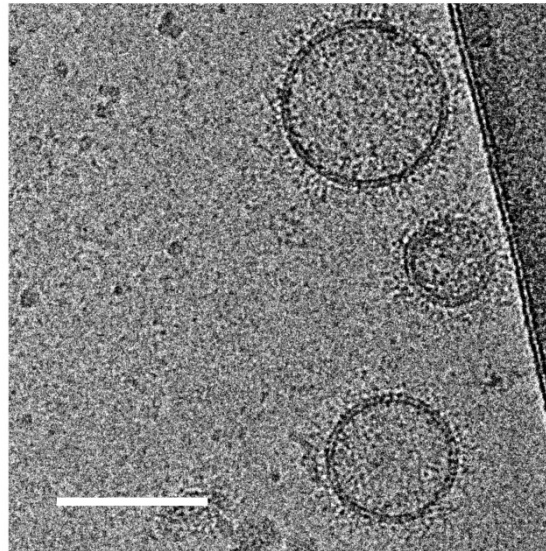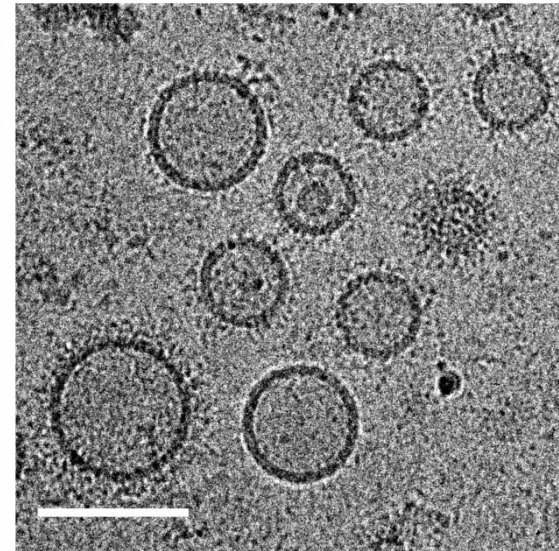

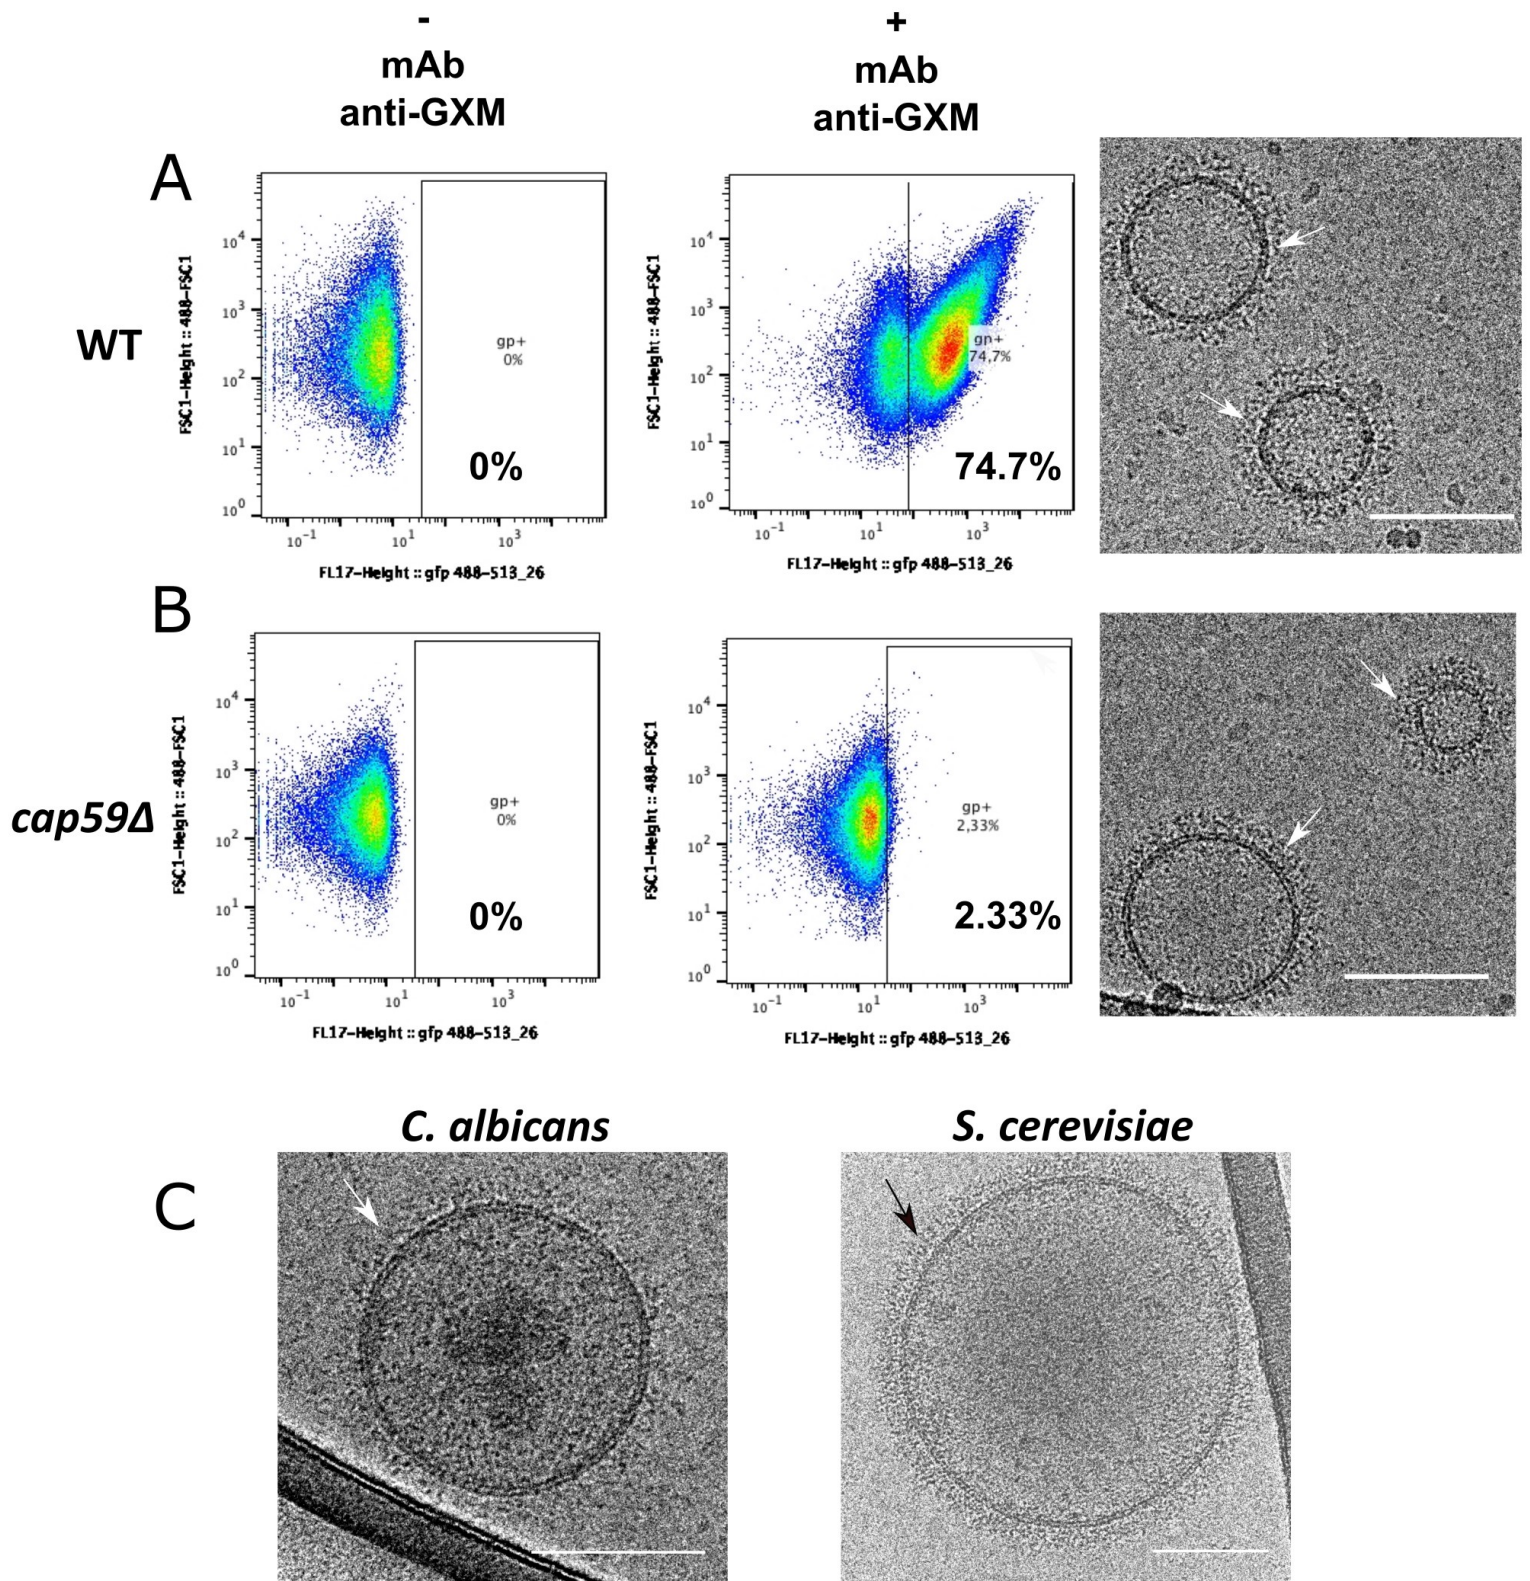

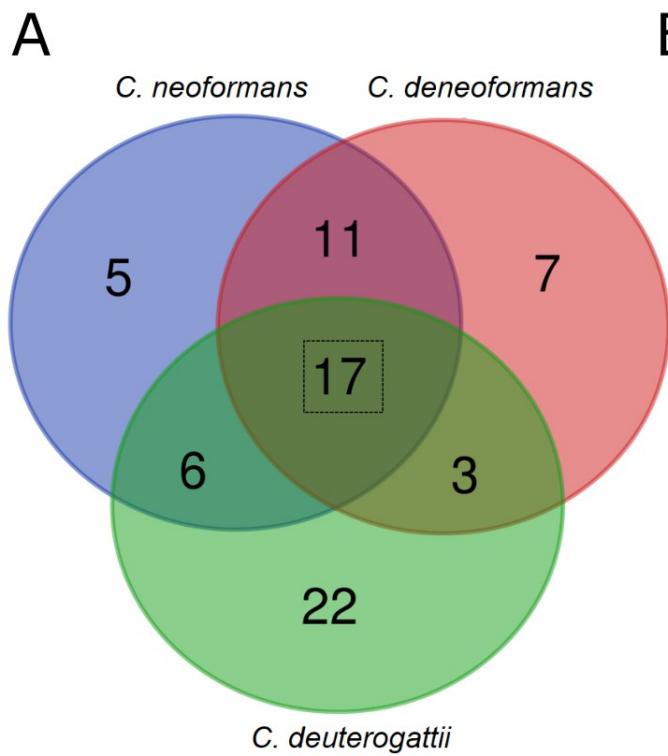

**B** List of EV- enriched proteins shared by the three *Cryptococcus spp.*

| <i>C. deuterogattii</i> | <i>C. deneoformans</i> | <i>C. neoformans</i> | Protein name | Putative function                                        |
|-------------------------|------------------------|----------------------|--------------|----------------------------------------------------------|
| CNBG_1155               | CNA07540               | CNAG_00776           | Mp88         | Immunoreactive mannoprotein                              |
| CNBG_3648               | CNC06180               | CNAG_03007           | Cpc1         | DUF3759                                                  |
| CNBG_3432               | CNC03950               | CNAG_02775           | Bim1         | BCS-inducible membrane protein                           |
| CNBG_9064               | CND03490               | CNAG_01230           | Mp98/Cda2    | Chitin deacetylase                                       |
| CNBG_5182               | CNE05040               | CNAG_02030           | Gox2         | Glyoxaloxidase                                           |
| CNBG_3374               | CNC03380               | CNAG_01854           | Hep2         | Heparinase II/III family protein                         |
| CNBG_1745               | CNF01800               | CNAG_05799           | Cda1         | Chitin deacetylase                                       |
| CNBG_4970               | CNN02260               | CNAG_06501           | Gas1         | 1,3-Beta-glucanosyltransferase                           |
| CNBG_5817               | CNJ03160               | CNAG_04891           | Ril1         | Ricin-type beta-trefoil lectin domain-containing protein |
| CNBG_4258               | CNH02560               | CNAG_05615           | Sso1         | t-SNARE complex subunit                                  |
| CNBG_9173               | CNF01900               | CNAG_05788           | Vma10        | V-type ATPase, G subunit                                 |
| CNBG_5332               | CNE03480               | CNAG_02189           | Amy1         | Alpha-amylase                                            |
| CNBG_4145               | CNE01150               | CNAG_02443           | Vep3         | NADH dehydrogenase                                       |
| CNBG_5365               | CNE03150               | CNAG_02225           | Exg104       | Glucan 1,3-beta-glucosidase                              |
| CNBG_0679               | CND02350               | CNAG_01109           | Vep4         | Hypothetical protein                                     |
| CNBG_0806               | CND03580               | CNAG_01239           | Cda3         | Chitin deacetylase                                       |
| CNBG_5038               | CNN01470               | CNAG_06422           | Vep5         | Hypothetical protein                                     |

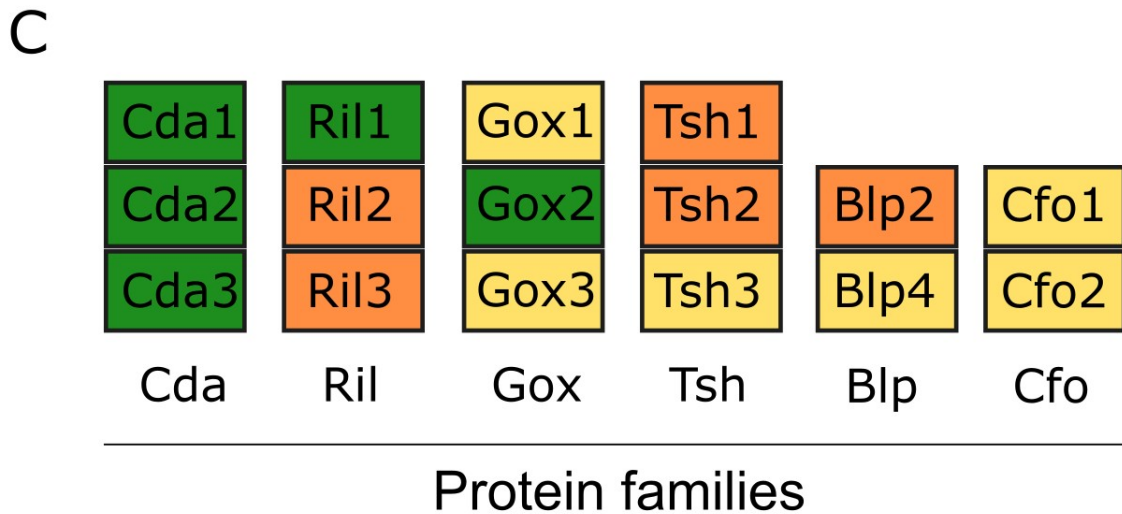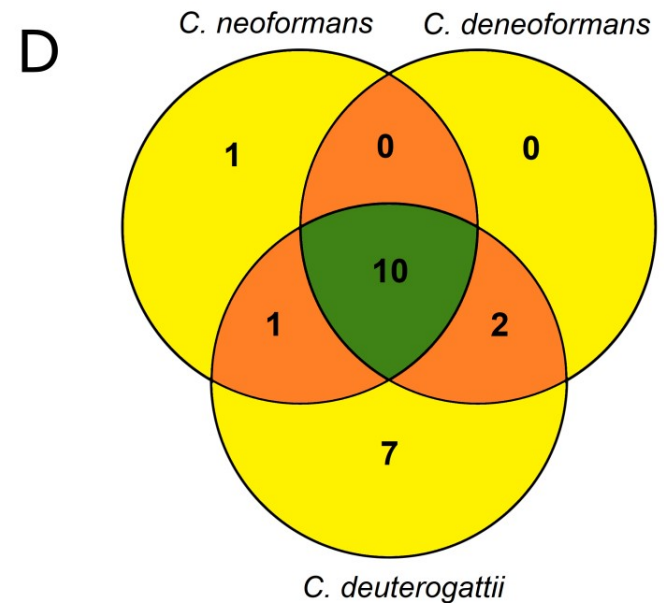



- ConA

PBS

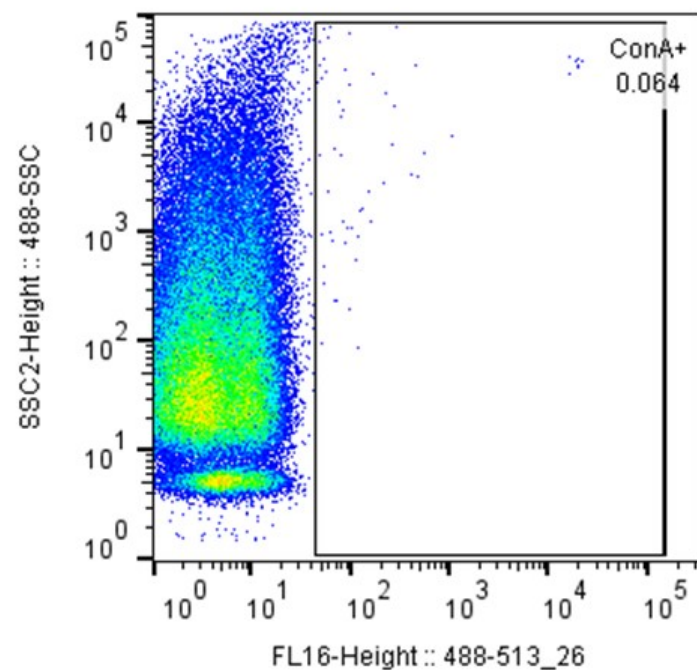

WT

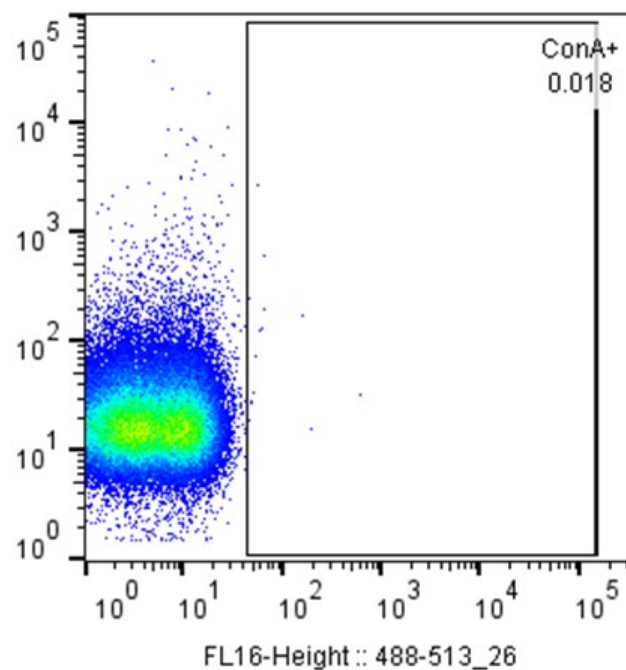

*cap59*Δ

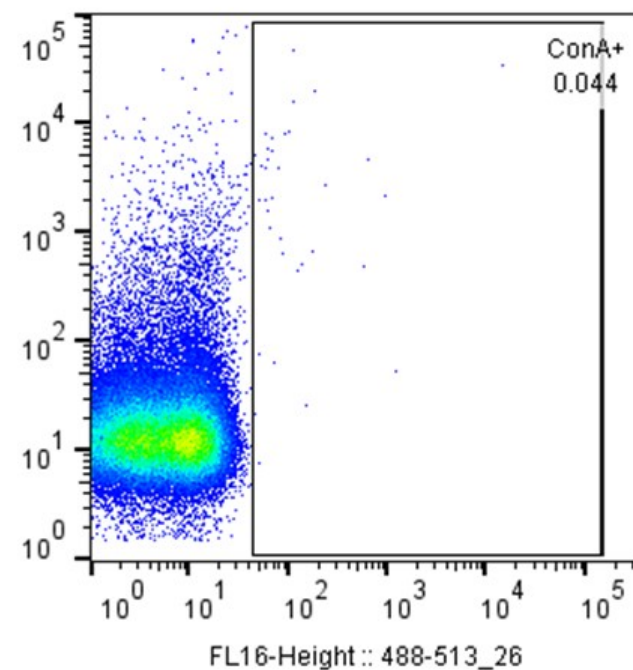

+ ConA

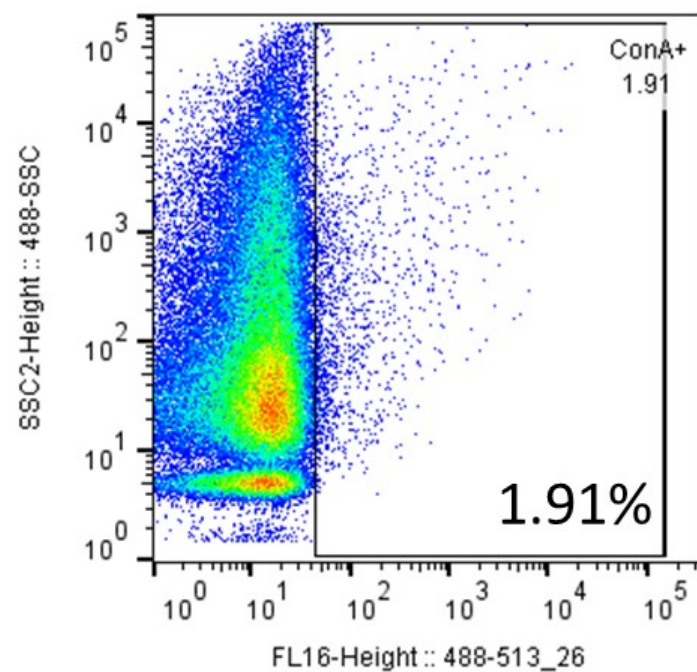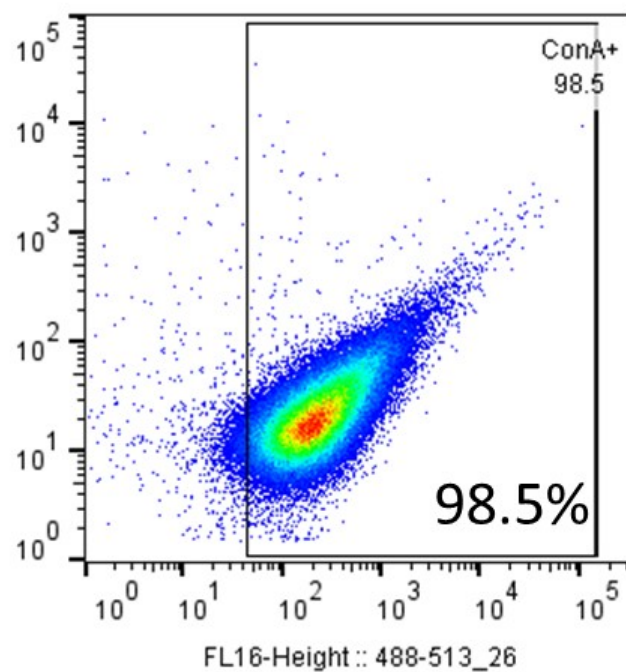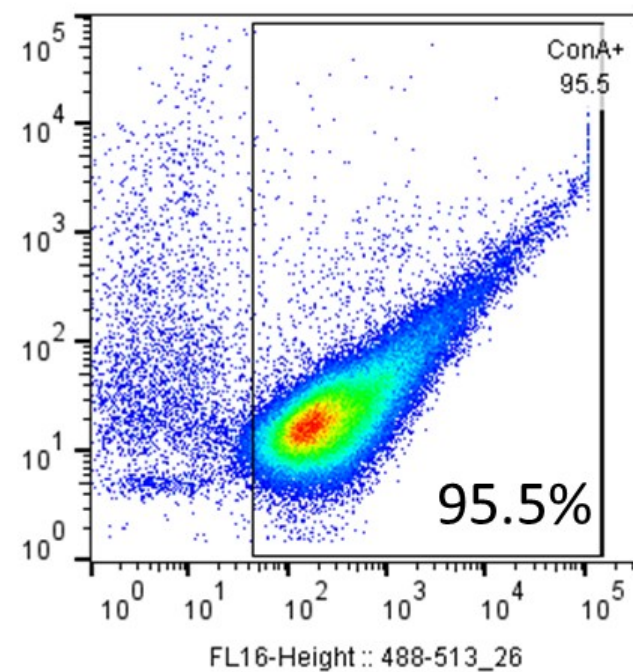

WT

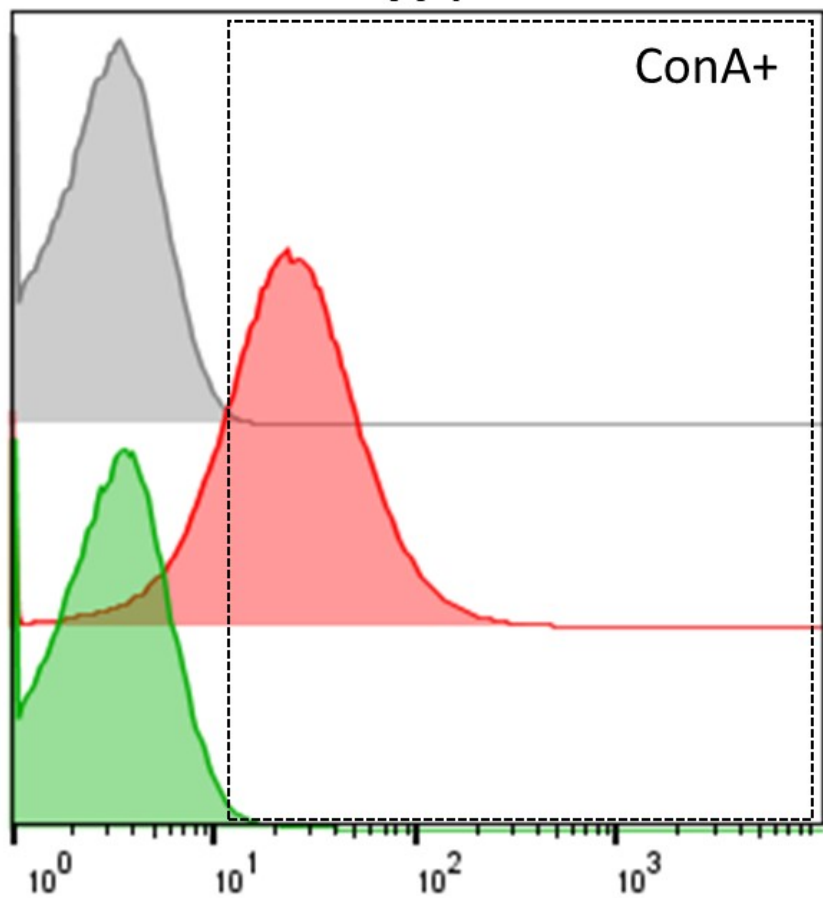

FL16-Height :: 488-513\_26

*cap59Δ*

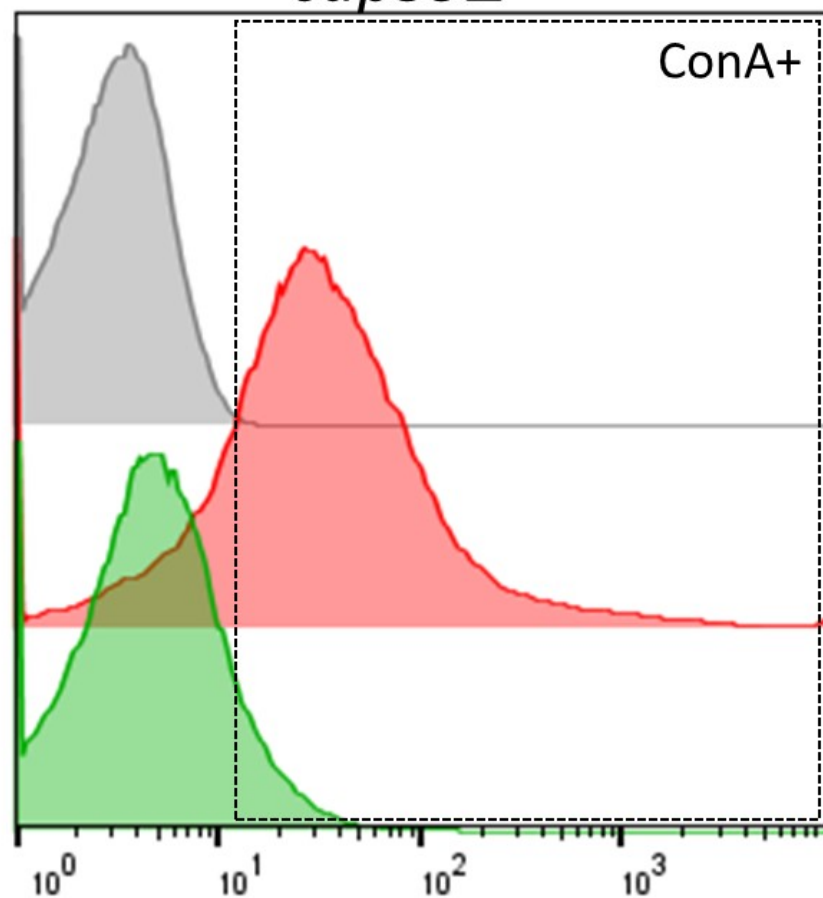

FL16-Height :: 488-513\_26

ConA+

ConA+

EVs

EVs + ConA

EVs + PK+ ConA

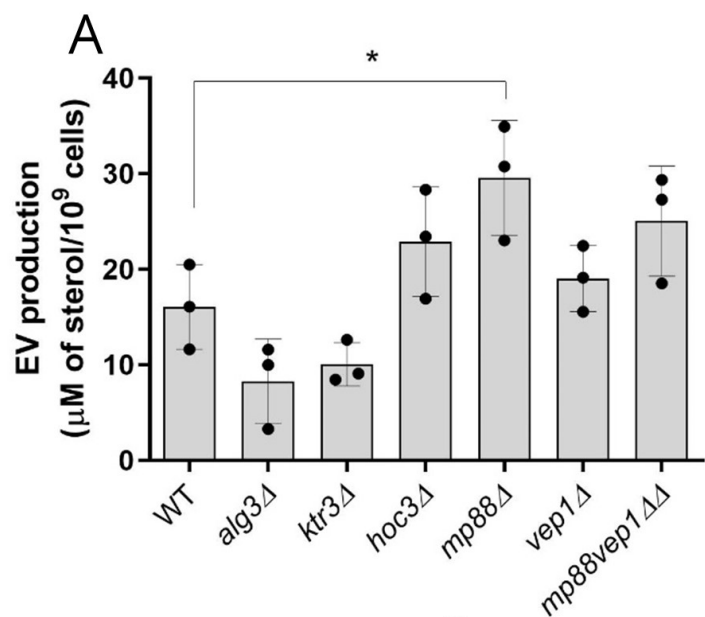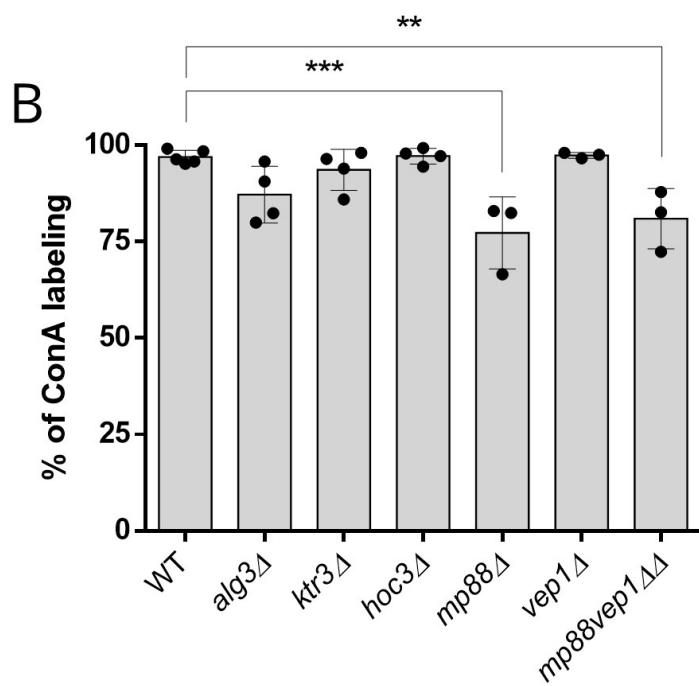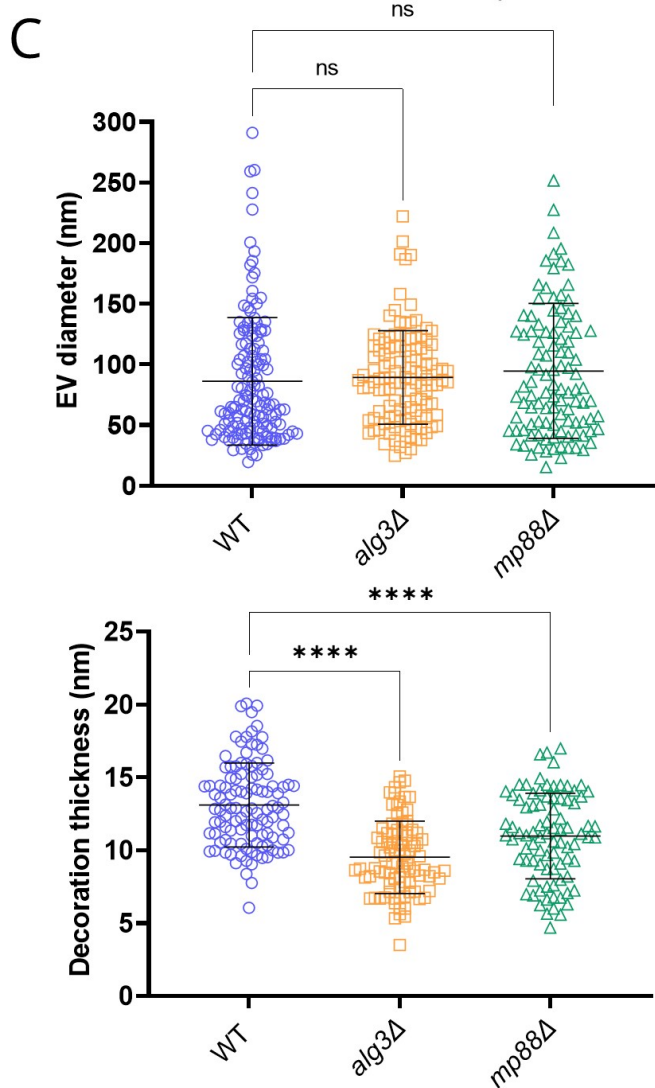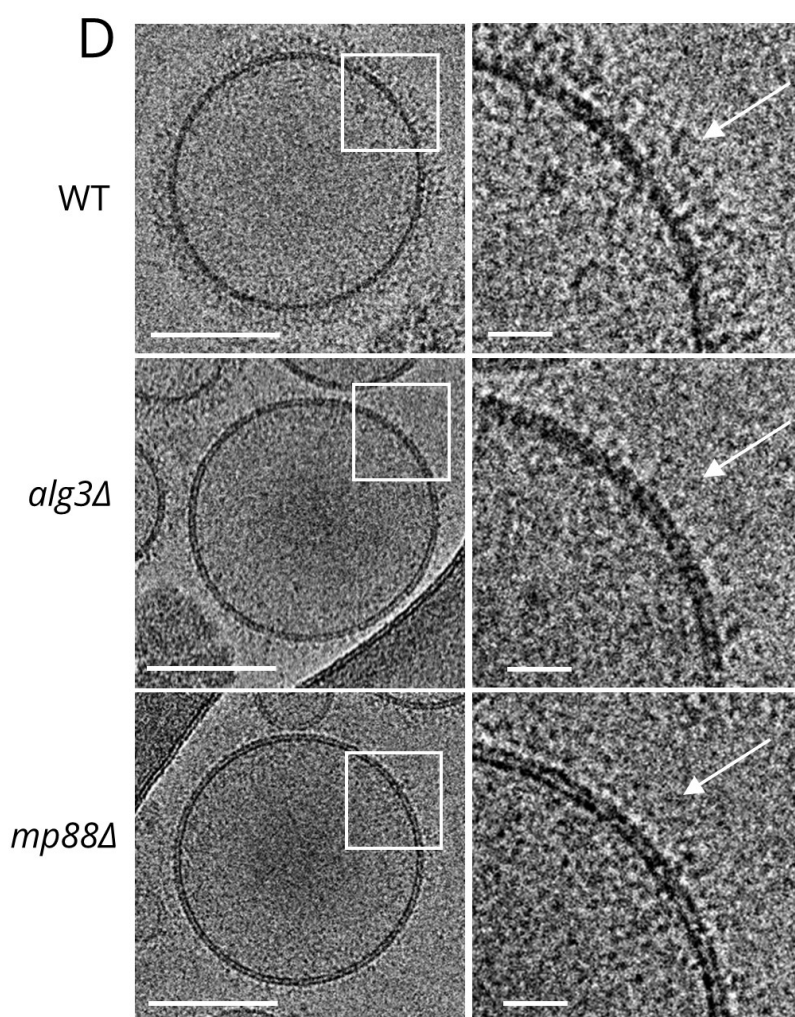

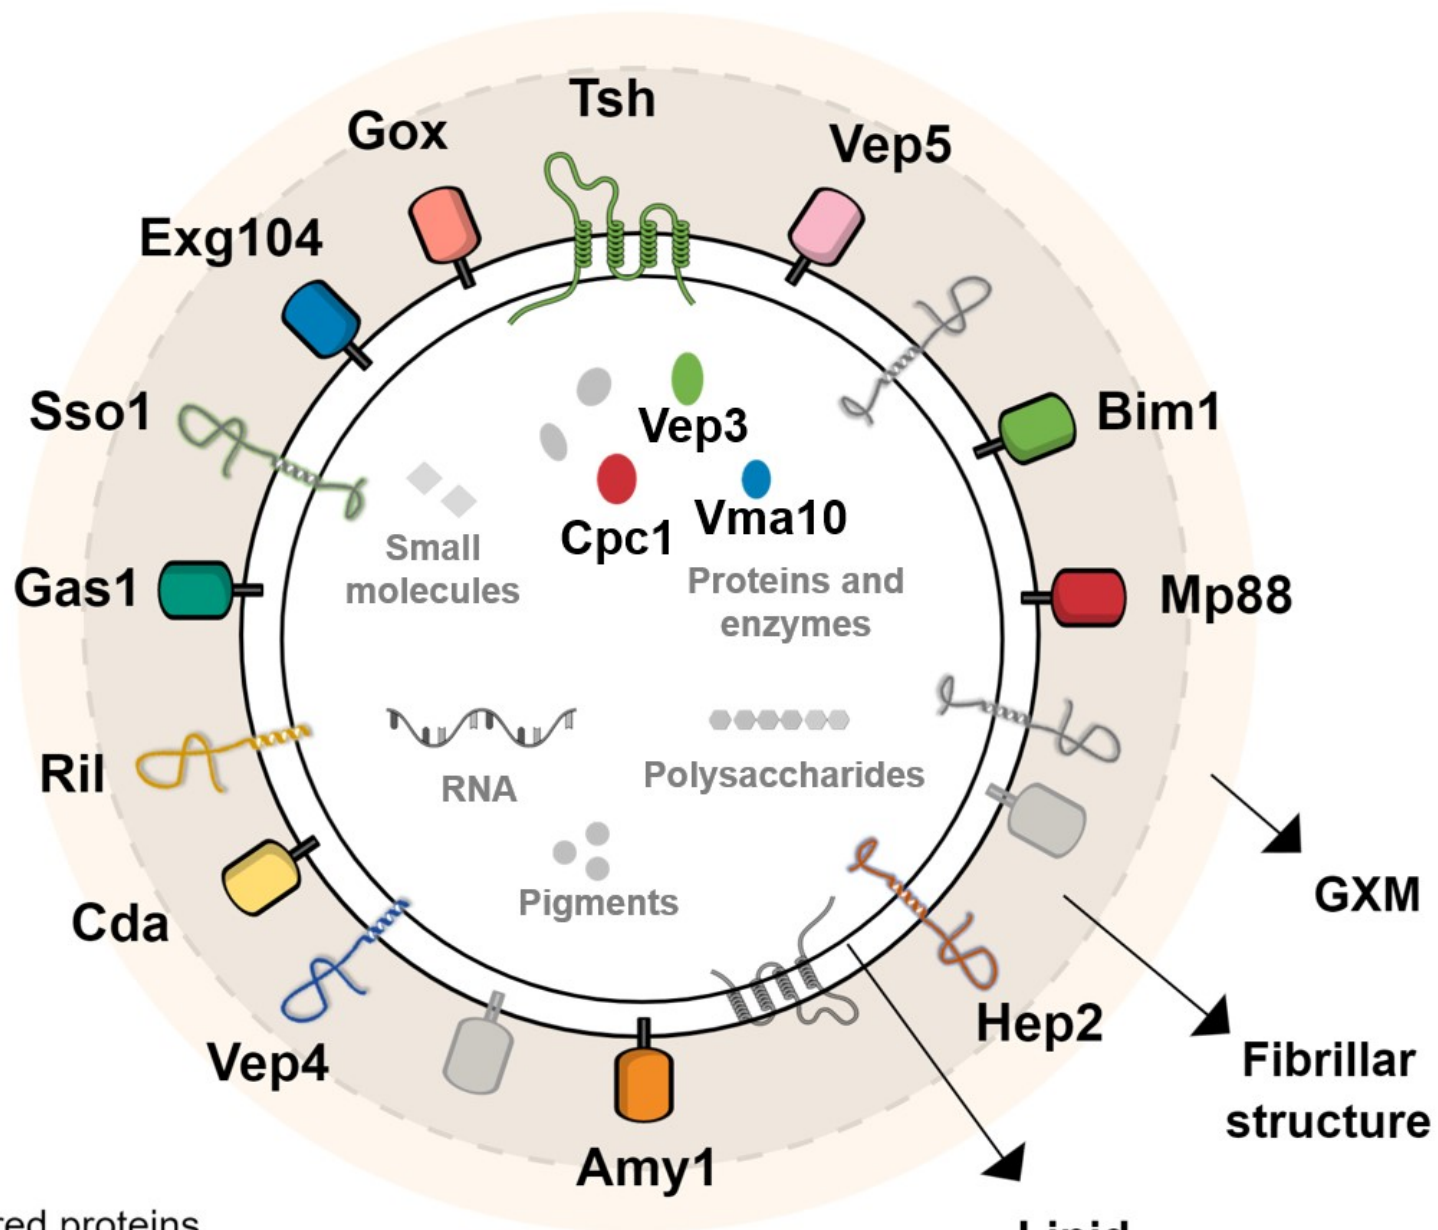

 GPI-anchored proteins

 Transmembrane proteins or proteins with N-terminal signal peptide

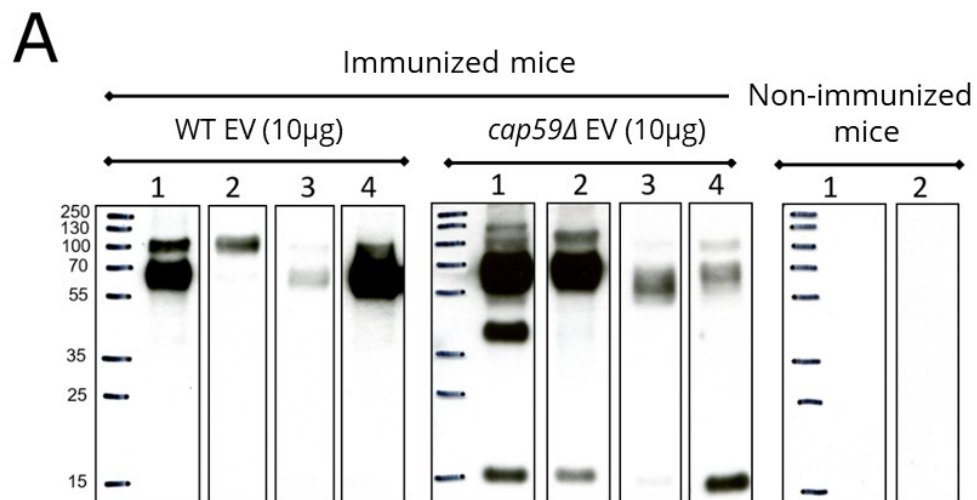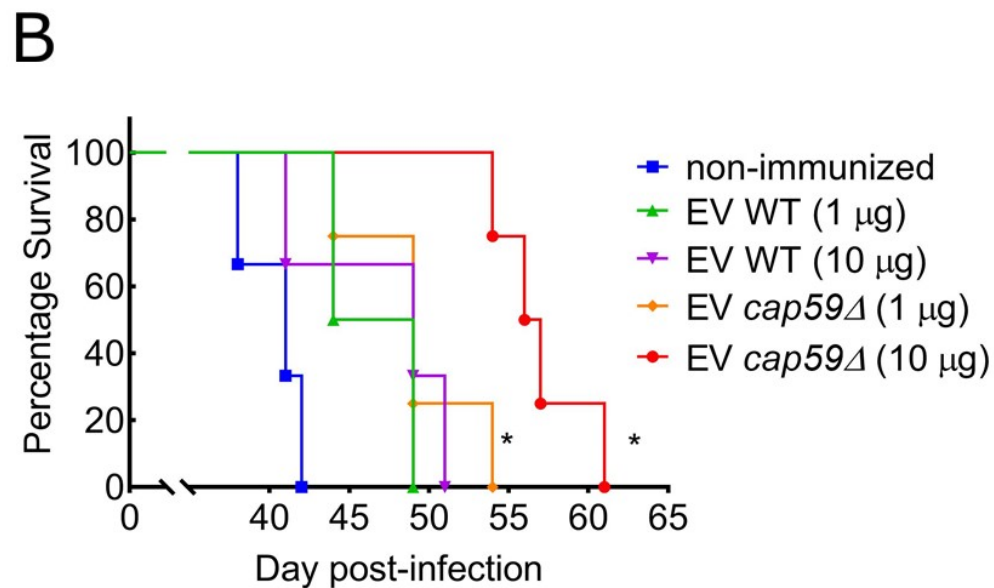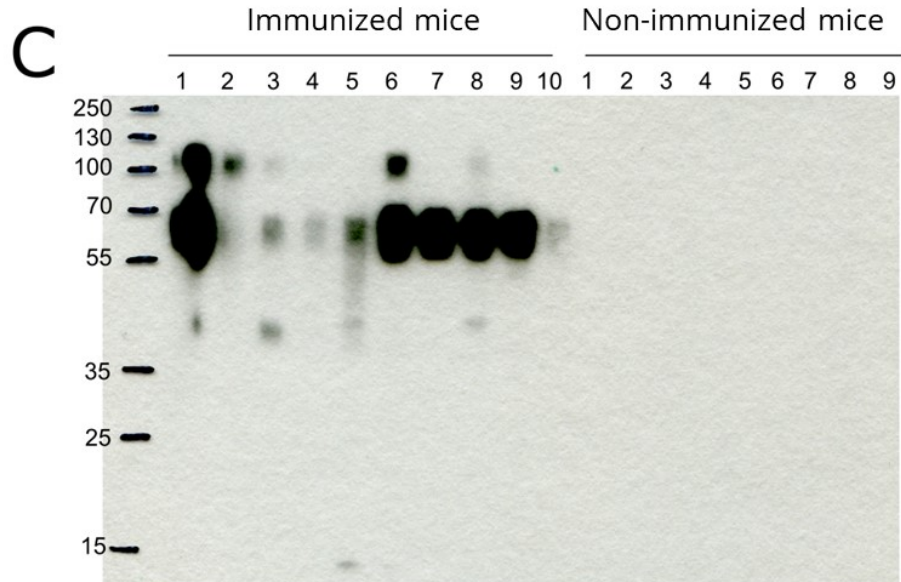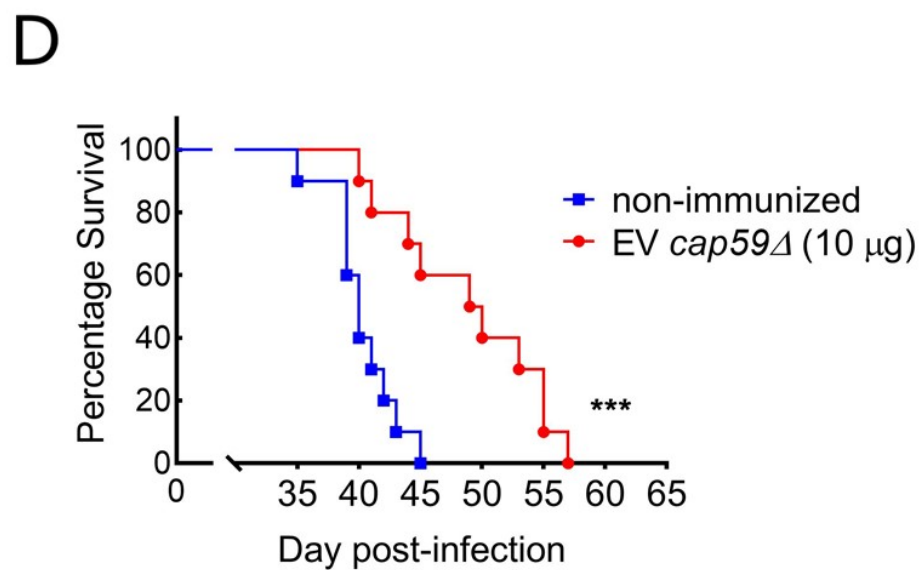

Source: https://www.biorxiv.org/content/biorxiv/early/2021/05/17/2020.08.17.253716.full.pdf
